# Supplementary material for: Microbiota composition and correlations with environmental factors in grass carp (Ctenopharyngodon idella) culture ponds in South China
Source: PeerJ. 2023 Oct 12;11:e15892. doi: 10.7717/peerj.15892 (PMC10576968; doi:10.7717/peerj.15892)
Supplement: Supplemental Information 2 — Four types of ponds with 3 ponds for each type were investigated. Three surface waters approximately 50 cm below the water level (approximately 1 L) and three upper (0–8 cm) sediment (approximately 500 g) samples were collected from the left, center, and right of each pond using a 5 L hydrophore sampler and Van Veen Grab sampler to study, respectively. LF, larval fish; SJ, small juvenile fish; MJ, middle juvenile fish; LJ, large juvenile fish. [file peerj-11-15892-s002.xlsx]

## Sheet: Sheet1
Table S2. Dominant OTUs detected in the water and sediment microbiota in ponds cultured with different sizes of grass carp. Four types of ponds with 3 ponds for each type were investigated. Three surface waters approximately 50 cm below the water level (approximately 1 L) and three upper (0-8 cm) sediment (approximately 500 g) samples were collected from the left, center, and right of each pond u…
OTUID	Domain	Phylum	Class	Order	Family	Genus	Species	LJP1S1W	LJP1S2W	LJP1S3W	LJP2S1W	LJP2S2W	LJP2S3W	LJP3S1W	LJP3S2W	LJP3S3W	SJP1S1W	SJP1S2W	SJP1S3W	SJP2S1W	SJP2S2W	SJP2S3W	SJP3S1W	SJP3S2W	SJP3S3W	LFP1S1W	LFP1S2W	LFP1S3W	LFP2S1W	LFP2S2W	LFP23W	LFP3S1W	LFP3S2W	LFP3S3W	MJP1S1W	MJP1S2W	MJP1S3W	MJP2S1W	MJP2S2W	MJP2S3W	MJP3S1W	MJP3S2W	MJP3S3W	LJP1S1S	LJP1S2S	LJP1S3S	LJP2S1S	LJP2S2S	LJP2S3S
OTU_108	Archaea	Euryarchaeota	Methanomicrobia	Methanosarcinales	Methanosaetaceae	Methanosaeta	metagenome	0.000209006	9.4304e-05	7.55829e-05	0.000220613	0.000208227	9.26252e-05	0.000113381	0.000129586	0.000204716	0	3.74869e-05	1.83288e-05	9.49433e-05	0	1.88175e-05	3.81599e-05	0	0	0	0	0.000988769	1.84935e-05	1.88875e-05	0	1.87399e-05	0	0	0.000263183	7.48727e-05	0.000115467	0.000266763	0.000260141	0.00013419	0.000223189	0.000193626	0.000189365	0.00619954	0.00754908	0.00915919	0.00403141	0.0104112	0.00544547
OTU_1	Bacteria	Proteobacteria	Gammaproteobacteria	Steroidobacterales	Steroidobacteraceae	uncultured	uncultured gamma proteobacterium	0.00602318	0.0055828	0.00489399	0.00726183	0.00859409	0.00868824	0.00466751	0.00531304	0.00487596	0.000134174	0.000337382	0.000238274	0.0145453	0.00262725	0.00274736	0.0288489	0.0159831	0.01124	0.00061032	0.00142832	0.00444013	0.011281	0.00691283	0.00224938	0.00252989	0.00115055	0.000578552	0.00501927	0.00295747	0.00365645	0.00504945	0.00468254	0.00352727	0.00256668	0.00365953	0.00267005	0.0530148	0.0537775	0.0446463	0.0368778	0.0428902	0.0321245
OTU_4	Bacteria	Proteobacteria	Gammaproteobacteria	Betaproteobacteriales	Rhodocyclaceae	Dechloromonas	uncultured bacterium	0.00247007	0.0023576	0.00183289	0.00180167	0.00185511	0.00246383	0.00209755	0.00186975	0.00184244	0.000249181	0.000187434	0.000183288	0.00613334	0.00141758	0.00156185	0.0134895	0.00714061	0.00484452	0.00020344	0.00034743	0.0013992	0.00708302	0.00268203	0.000934063	0.00123684	0.000479396	0.000391923	0.00127832	0.000711291	0.000635067	0.00184829	0.00169092	0.00120771	0.00152513	0.00199435	0.001193	0.026266	0.0225305	0.0280907	0.0145323	0.0268745	0.0142376
OTU_2	Bacteria	Actinobacteria	Actinobacteria	PeM15	metagenome	metagenome	metagenome	0.00756223	0.00790268	0.00606553	0.0164356	0.0124368	0.0213408	0.0147773	0.0211226	0.0182383	0.0167143	0.0154633	0.0141315	0.013463	0.0212826	0.0118927	0.0190418	0.0171856	0.0194738	0.050897	0.0143218	0.0347562	0.074196	0.0928888	0.0809966	0.0360931	0.0262517	0.0216117	0.0110349	0.011025	0.0135289	0.00830777	0.00585317	0.00910572	0.0161254	0.0137474	0.011324	0.000289698	0.000389128	0.000440714	0.000691098	0.000330823	0.000472697
OTU_3	Bacteria	Proteobacteria	Gammaproteobacteria	Betaproteobacteriales	Burkholderiaceae	Polynucleobacter	uncultured bacterium	0.0494775	0.0464919	0.0445561	0.00761113	0.00628467	0.00735444	0.00289121	0.00383206	0.00308935	0.0110981	0.00910931	0.00943932	0.0113742	0.0100176	0.0131911	0.00507527	0.00603067	0.00658701	0.00774921	0.00773997	0.00582068	0.0250032	0.0313911	0.0335881	0.0204827	0.0236821	0.0228995	0.0182912	0.0160602	0.0183785	0.014691	0.0179869	0.0174255	0.0150095	0.0145413	0.0130283	0.000193132	0.000155651	0.000153292	5.75915e-05	1.94602e-05	3.78158e-05
OTU_47	Bacteria	Cyanobacteria	Oxyphotobacteria	Chloroplast	unidentified marine eubacterium	unidentified marine eubacterium	unidentified marine eubacterium	0.0262968	0.021539	0.0279657	0.0376512	0.0511292	0.0427928	0.0487349	0.0416158	0.0288277	0.000268348	0.000281152	0.000183288	0.0119439	0.000831648	0.00444093	0.021713	0.0166491	0.0134995	0.000388385	0.00631164	0.00149248	0.00166442	0.00101993	0.000419375	0.00119936	0.00115055	0.0010078	0.0190619	0.0215259	0.0178589	0.0331739	0.0342271	0.0238474	0.0424246	0.0429268	0.0445576	0.0014678	0.00116738	0.000958075	0.00343629	0.00124545	0.00138028
OTU_6	Bacteria	Fusobacteria	Fusobacteriia	Fusobacteriales	Fusobacteriaceae	Cetobacterium	uncultured bacterium	0.0459244	0.0379479	0.0754885	0.0174284	0.0170557	0.0195439	0.0235265	0.0163094	0.0160795	0.000115006	0.000131204	0.000109973	0.00313313	0.0016633	0.00143013	0.00261396	0.00234937	0.00254672	0.00020344	0.000154413	0.000522369	0.0022932	0.00141656	0.000476563	9.36996e-05	3.83516e-05	0	0.00592161	0.00385594	0.00486885	0.00310589	0.00444098	0.00381482	0.00717926	0.0113077	0.00897591	0.00169956	0.000972819	0.000689814	0.00552879	0.00237414	0.0136704
OTU_52	Bacteria	Actinobacteria	Actinobacteria	PeM15	uncultured bacterium	uncultured bacterium	uncultured bacterium	0.0113053	0.0122407	0.00846529	0.0102033	0.00844265	0.0131528	0.0106956	0.014199	0.0138276	0.015085	0.0118084	0.0120787	0.0122287	0.0126448	0.0109518	0.0145962	0.0167971	0.0159697	0.0155909	0.00795229	0.0101489	0.0248553	0.0278402	0.0267066	0.0169784	0.0141518	0.0129334	0.0138735	0.0162474	0.0177049	0.00996551	0.00864039	0.0099492	0.0106201	0.00917786	0.0085025	0.000811155	0.00112847	0.00116885	0.00230366	0.000467044	0.00130464
OTU_11	Bacteria	Actinobacteria	Actinobacteria	Frankiales	Sporichthyaceae	hgcI clade	uncultured bacterium	0.00792324	0.00712939	0.00729375	0.0103504	0.010771	0.0106519	0.0125475	0.0139398	0.0136415	0.0214295	0.0220423	0.0134167	0.0327744	0.0310167	0.0325355	0.01908	0.018092	0.0183441	0.0170335	0.0185103	0.0168837	0.0194182	0.0220606	0.0236947	0.026442	0.0274214	0.0206599	0.00960617	0.00776804	0.0097377	0.0124617	0.0120594	0.0121921	0.0177436	0.0199628	0.016721	0	1.94564e-05	0	1.91972e-05	0	1.89079e-05
OTU_5	Bacteria	Proteobacteria	Gammaproteobacteria	Betaproteobacteriales	Burkholderiaceae	Limnobacter	uncultured bacterium	0.0201026	0.0207657	0.0174786	0.0184211	0.0187783	0.0186362	0.0125097	0.0156985	0.0141998	0.00755209	0.00802219	0.0064334	0.0123236	0.0143837	0.0147341	0.0114289	0.00943449	0.0122358	0.00545589	0.00366732	0.00471997	0.0211196	0.0190008	0.0276978	1.87399e-05	0	0	0.0196447	0.0157233	0.018109	0.0172634	0.0180426	0.0187674	0.0219098	0.0198079	0.0190123	1.93132e-05	3.89128e-05	0	0	0	3.78158e-05
OTU_7	Bacteria	Actinobacteria	Actinobacteria	Micrococcales	Microbacteriaceae	Aurantimicrobium	uncultured bacterium	0.00302109	0.00337608	0.00281546	0.00349303	0.00342628	0.00427928	0.00323135	0.0040542	0.00398265	1.91677e-05	3.74869e-05	3.66576e-05	5.6966e-05	0.000151209	3.7635e-05	0.00024804	0.000166491	0	0.00149806	0.000849273	0.00102608	0.00595491	0.00557182	0.00646219	0.000131179	0.000134231	0.000130641	0.000187988	0.000299491	0.000269422	0.0002096	0.000167233	0.00013419	0.000260388	0.000154901	0.000113619	0.000888408	0.000875537	0.000996398	0.000844676	0.000856248	0.000491605
OTU_10	Bacteria	Cyanobacteria	Oxyphotobacteria	Nostocales	Microcystaceae	Microcystis PCC-7914	Microcystis aeruginosa DIANCHI905	0.00704921	0.00607318	0.00508295	0.00264735	0.00285839	0.00320483	0.00277783	0.00372098	0.00340573	0.00502195	0.00644774	0.00399567	0.00598143	0.00706901	0.00568289	0.00480815	0.00321882	0.0027765	0.00750878	0.0198421	0.0120891	0.00917278	0.0081783	0.00480375	0.0352685	0.100731	0.197678	0.00402293	0.0026767	0.00238631	0.00224843	0.00198822	0.00199367	0.00297586	0.00313674	0.00350326	3.86264e-05	3.89128e-05	5.74845e-05	0.000211169	1.94602e-05	0.000151263
OTU_12	Bacteria	Cyanobacteria	Oxyphotobacteria	Nostocales	Phormidiaceae	Planktothrix NIVA-CYA 15	uncultured bacterium	0.00248907	0.00324406	0.00411927	0.00266574	0.00202548	0.00137085	0.00697292	0.00649783	0.00519234	0.14142	0.126912	0.190308	0.010045	0.00576483	0.00477965	0.00125928	0.00146142	0.00145527	0.000998705	0.000424637	0.000839521	0.000887689	0.000849939	0.000743438	1.87399e-05	3.83516e-05	0	0.000206786	0.000168464	0.000153956	0.000743126	0.000761841	0.000345059	0.0114199	0.0118112	0.0134449	0	0	0	0	0	1.89079e-05
OTU_26	Bacteria	Planctomycetes	Phycisphaerae	Phycisphaerales	Phycisphaeraceae	CL500-3	uncultured bacterium	0.00685921	0.00735571	0.00466725	0.0078869	0.010222	0.0100035	0.00391164	0.00662742	0.00593676	0.0299208	0.0304956	0.0199784	0.0215331	0.0143081	0.0222047	0.0190418	0.0129678	0.0162952	1.84945e-05	3.86033e-05	3.7312e-05	0.00216374	0.00381528	0.00263063	0.0108504	0.013634	0.0126348	0.00718113	0.00600854	0.00613898	0.00889846	0.00968096	0.00628774	0.0133356	0.0108043	0.0114187	0.000270385	0.000525322	0.000344907	0.000537521	0.000330823	0.000661776
OTU_17	Bacteria	Cyanobacteria	Oxyphotobacteria	Chloroplast	Trachydiscus minutus	Trachydiscus minutus	Trachydiscus minutus	0.00712521	0.0113542	0.0149843	0.032522	0.015617	0.016265	0.0194637	0.011996	0.00870973	0.00109256	0.00164942	0.00263934	0.00617132	0.00451736	0.0022581	0.00358703	0.00312633	0.00350414	0.00110967	0.000250922	0.00251856	0.0126126	0.0124847	0.00712938	0.00522844	0.00139984	0.0010078	0.00652317	0.0132712	0.00644689	0.0084602	0.00785997	0.0190358	0.0139121	0.0176393	0.0122519	0.00245278	0.00175107	0.00231854	0.0126893	0.00396988	0.00712827
OTU_56	Bacteria	Proteobacteria	Deltaproteobacteria	Desulfuromonadales	Geobacteraceae	Geothermobacter	Unclassified	0.00119704	0.00105621	0.000566872	0.000606685	0.00119257	0.00131528	0.000869253	0.000888593	0.00113524	0	1.87434e-05	3.66576e-05	0.000702581	9.45055e-05	7.527e-05	0.00242316	0.000887952	0.000517004	1.84945e-05	3.86033e-05	1.8656e-05	0.000258909	0.000113325	1.90625e-05	9.36996e-05	1.91758e-05	5.5989e-05	0.00219945	0.000935909	0.00132787	0.00144814	0.00117063	0.00101601	0.000762564	0.00106494	0.000719588	0.012515	0.0121213	0.00929332	0.0117295	0.00904898	0.00752534
OTU_24	Bacteria	Proteobacteria	Gammaproteobacteria	Betaproteobacteriales	Hydrogenophilaceae	Thiobacillus	uncultured bacterium	0.000551017	0.00069785	0.000547976	0.000496378	0.000700399	0.000759527	0.000699182	0.000721982	0.0007072	1.91677e-05	5.62303e-05	0	0.000436739	5.67033e-05	0.000131723	0.00024804	0.000147992	0.00011489	3.69891e-05	0.00023162	0.000149248	0.000147948	3.7775e-05	7.625e-05	0.000337319	7.67033e-05	3.7326e-05	0.00131591	0.000598982	0.000769778	0.00080029	0.000520282	0.000421739	0.000316185	0.000445339	0.00043554	0.00930897	0.0113042	0.0102706	0.0268568	0.011715	0.0221979
OTU_23	Bacteria	Proteobacteria	Alphaproteobacteria	Sphingomonadales	Sphingomonadaceae	Novosphingobium	uncultured bacterium	0.0218507	0.0220671	0.0227505	0.0102953	0.0102031	0.00887349	0.0144372	0.0145692	0.0130646	0.000402522	0.000281152	0.000513206	0.00698783	0.00400703	0.00786572	0.00331991	0.00384779	0.00492111	0.00626965	0.00380243	0.00311556	0.00281101	0.00304089	0.00301188	0.000899517	0.0011122	0.000783845	0.0103581	0.00621444	0.0105267	0.0082125	0.0101269	0.00966165	0.013503	0.0154901	0.0130851	0.00152574	0.00118684	0.00155208	0.00215008	0.00128437	0.000926486
OTU_14	Bacteria	Cyanobacteria	Oxyphotobacteria	Synechococcales	Cyanobiaceae	Cyanobium PCC-6307	uncultured cyanobacterium	0.00494015	0.00477178	0.00260761	3.67688e-05	0.000132508	1.8525e-05	3.77936e-05	5.5537e-05	3.72211e-05	0.000287516	0.000187434	0.000183288	0	0	1.88175e-05	7.63199e-05	7.3996e-05	1.91483e-05	0	0	0	0	0	1.90625e-05	0.000393538	0.000479396	0.000317271	0.0811918	0.0904837	0.0788446	0.0513138	0.0570638	0.0440717	0.0205706	0.0175425	0.0199591	3.86264e-05	0	0	0	0	0
OTU_8	Bacteria	Proteobacteria	Alphaproteobacteria	SAR11 clade	Clade III	uncultured bacterium	uncultured bacterium	0.0101463	0.0113542	0.013416	0.00917381	0.00906733	0.00933662	0.0120751	0.0101818	0.0103475	0.00458109	0.00406733	0.0035008	0.0115451	0.0069934	0.010519	0.00610559	0.00486523	0.00553385	9.24727e-05	0	3.7312e-05	0	1.88875e-05	0	1.87399e-05	0	0	0.0240436	0.0200472	0.0213229	0.0195118	0.022465	0.0181156	0.0202544	0.0204275	0.0182737	1.93132e-05	0	0	3.83943e-05	0	1.89079e-05
OTU_65	Bacteria	Proteobacteria	Gammaproteobacteria	Betaproteobacteriales	Rhodocyclaceae	Dechloromonas	uncultured bacterium	0.00152005	0.00137684	0.00113374	0.000974372	0.00124936	0.00129675	0.00211644	0.00196231	0.00238215	1.91677e-05	7.49738e-05	5.49863e-05	0.000436739	5.67033e-05	0.000169358	0.00341531	0.00162791	0.00112975	3.69891e-05	5.7905e-05	0.000167904	0.000924676	0.000472188	0.0001525	0.00011244	5.75275e-05	1.8663e-05	0.000864743	0.000318209	0.000500356	0.000933671	0.00117063	0.000824307	0.000446379	0.000542152	0.000416604	0.012148	0.0104092	0.0130873	0.00656543	0.0120069	0.00588035
OTU_20	Bacteria	Proteobacteria	Gammaproteobacteria	SZB30	uncultured bacterium	uncultured bacterium	uncultured bacterium	0.000247007	0.00022633	0.000188957	0.000514763	0.000454313	0.000685426	0.000321246	0.000296198	0.000446653	1.91677e-05	0	1.83288e-05	0.000892467	0.00034022	0.000244628	0.000953998	0.000591968	0.000268076	0.000129462	9.65083e-05	0.000839521	0.00164592	0.000982151	0.000266875	0.000281099	0.000134231	3.7326e-05	0.000526365	0.000262055	0.000384889	0.000724072	0.000427374	0.000421739	0.000557973	0.000561515	0.000397667	0.00401715	0.00453334	0.00398559	0.00401221	0.00593535	0.00412192
OTU_9	Bacteria	Proteobacteria	Gammaproteobacteria	Run-SP154	uncultured bacterium	uncultured bacterium	uncultured bacterium	0.000475014	0.000301773	0.000188957	0.000220613	0.000454313	0.000389026	0.00041573	0.000481321	0.0007072	1.91677e-05	0	0	0.00205078	0.000302417	0.000188175	0.00297647	0.000702962	0.000593597	1.84945e-05	0.00023162	0.000335808	0.000295896	0.0003022	0.000114375	0.000805817	0.000345165	0.000223956	0.000338378	0.000187182	0.000153956	0.00038109	0.000650352	0.000575098	0.00020459	0.000367889	0.000189365	0.0052532	0.00484464	0.00519276	0.00318673	0.00515695	0.00321434
OTU_13	Bacteria	Verrucomicrobia	Verrucomicrobiae	Chthoniobacterales	Chthoniobacteraceae	LD29	uncultured bacterium	0.00560517	0.00782724	0.00680246	0.00803397	0.00575463	0.00861414	0.0058958	0.0064423	0.00493179	0.0172318	0.017019	0.0121337	0.0146403	0.01204	0.0127583	0.014558	0.0205709	0.0202397	0.000240429	0.000173715	0.00018656	0.000110961	0.0003022	9.53125e-05	0.0170908	0.0129629	0.0117017	0.0106965	0.0103699	0.0109693	0.00409672	0.00408793	0.00385316	0.00742105	0.00575069	0.00515073	0.000560083	0.000466953	0.000536522	0.000307155	0.000233522	0.000226895
OTU_42	Bacteria	Actinobacteria	Actinobacteria	Corynebacteriales	Mycobacteriaceae	Mycobacterium	Unclassified	0.00742922	0.00763863	0.00343902	0.00654484	0.00543283	0.00722476	0.00504545	0.00683106	0.00910055	0.00684288	0.00491078	0.00887113	0.0046902	0.00999868	0.00730119	0.00719315	0.0112289	0.0118336	3.69891e-05	0	3.7312e-05	7.39741e-05	0.000245538	0.000133438	7.49597e-05	5.75275e-05	3.7326e-05	0.00468089	0.00511006	0.00621596	0.00651664	0.00325176	0.00617272	0.00610051	0.00832591	0.0069497	0.000309012	0.000544779	0.000344907	0.000652704	0.000758947	0.000340342
OTU_18	Bacteria	Actinobacteria	Actinobacteria	Micrococcales	Microbacteriaceae	Candidatus Aquiluna	uncultured bacterium	0.000627019	0.000811015	0.000812517	0.000900835	0.00113578	0.00107445	0.00260776	0.00283239	0.00256825	0.0047536	0.00609162	0.00505874	0.00132921	0.00189011	0.00127959	0.000705959	0.000647465	0.000612745	0.0114481	0.00828041	0.00966382	0.0382816	0.0346775	0.044835	0.0271916	0.0283035	0.0223396	0.00140991	0.00134771	0.00105845	0.000571635	0.000483119	0.000632608	0.00559833	0.00578941	0.00431753	0	0	1.91615e-05	3.83943e-05	1.94602e-05	0
OTU_14285	Bacteria	Verrucomicrobia	Verrucomicrobiae	Chthoniobacterales	Chthoniobacteraceae	LD29	uncultured bacterium	0.000912027	0.00143342	0.00130381	0.00380557	0.00244193	0.00387173	0.00264555	0.00377652	0.00256825	0.0204903	0.0216299	0.0147913	0.00759547	0.00646417	0.00750819	0.00780371	0.00997096	0.00886566	0.00739782	0.00472891	0.00583933	0.000332883	0.000415526	0.00061	0.0416401	0.0334043	0.0305513	0.00139111	0.00159105	0.00148182	0.000705017	0.000594608	0.000670948	0.00180411	0.00187817	0.00174216	7.72529e-05	3.89128e-05	3.8323e-05	0.000115183	7.78407e-05	9.45394e-05
OTU_16	Bacteria	Proteobacteria	Gammaproteobacteria	Betaproteobacteriales	Burkholderiaceae	MWH-UniP1 aquatic group	uncultured bacterium	0.00604218	0.00629951	0.00544197	0.0118395	0.0146895	0.0139679	0.00680285	0.00864527	0.00850502	0.0084338	0.0077223	0.00597518	0.00693086	0.00997978	0.0108577	0.00719315	0.00595668	0.00691253	0.0107268	0.0106738	0.00998097	0.00774878	0.00887714	0.0105988	0.00713991	0.00696082	0.00614012	0.0109785	0.0107255	0.0114312	0.0167299	0.0168162	0.0157769	0.00928096	0.00753205	0.00831313	0	0	1.91615e-05	0	3.89203e-05	1.89079e-05
OTU_74	Bacteria	Planctomycetes	Planctomycetacia	Pirellulales	Pirellulaceae	uncultured	uncultured Planctomyces sp.	0.00267908	0.00333836	0.00245645	0.00810751	0.00554641	0.00741001	0.00540449	0.0072013	0.00586232	0.00866382	0.00774104	0.00559028	0.00732962	0.0132497	0.0100862	0.0091393	0.0219768	0.0181909	0.0186425	0.00204598	0.0149435	0.00547408	0.00814052	0.0104653	0.00657771	0.00866747	0.00696129	0.00441771	0.00456724	0.00527298	0.00205789	0.00258283	0.00348893	0.00704906	0.00489873	0.00445008	0.000328325	0.000447497	0.000249099	0.000460732	0.000350283	0.000226895
OTU_15	Bacteria	Planctomycetes	Phycisphaerae	Phycisphaerales	Phycisphaeraceae	CL500-3	uncultured marine bacterium	0.0150675	0.0146737	0.0122444	0.0106813	0.0102031	0.011504	0.00304239	0.00460957	0.00409432	0.00833797	0.0101027	0.0052237	0.0113742	0.00659648	0.00961575	0.0176299	0.0167046	0.0183058	3.69891e-05	0	9.32801e-05	0	0	0	1.87399e-05	0	0	0.00364696	0.00286388	0.00371418	0.0143671	0.0145679	0.0133614	0.0166462	0.0169229	0.0141835	0.00305149	0.00260716	0.00224189	0.00117103	0.00186818	0.00100212
OTU_33	Bacteria	Proteobacteria	Deltaproteobacteria	Desulfobacterales	Desulfobulbaceae	uncultured	uncultured prokaryote	0.000114003	0.000207469	0.000302332	0.000220613	0.000246086	0.000444601	0.000302349	0.000129586	0.000223326	0	1.87434e-05	1.83288e-05	7.59547e-05	7.56044e-05	5.64525e-05	0.000534239	0.000240487	0.000172335	1.84945e-05	1.93017e-05	3.7312e-05	0.000462338	0.000207763	7.625e-05	7.49597e-05	1.91758e-05	0	0.000375975	5.61545e-05	0.0001732	0.000342981	0.000111489	0.00015336	0.000241788	0.000251714	0.000189365	0.00666306	0.00536996	0.00613168	0.00575915	0.0085041	0.0141431
OTU_795	Bacteria	Planctomycetes	Planctomycetacia	Pirellulales	Pirellulaceae	uncultured	uncultured Planctomyces sp.	0.00313509	0.00431912	0.0026643	0.00489025	0.00357772	0.00520554	0.00241879	0.00266578	0.00292185	0.0139349	0.0130454	0.00837625	0.0122477	0.018145	0.0163712	0.00883402	0.0203489	0.016793	0.00173849	0.000154413	0.00130592	0.000443844	0.000661063	0.000876875	0.0251677	0.0270379	0.0223956	0.00421092	0.00378107	0.00461867	0.00478268	0.00479402	0.00628774	0.00544954	0.00375634	0.00325708	0.000424891	0.000466953	0.00038323	0.000499127	0.000389203	0.000453789
OTU_28	Bacteria	Proteobacteria	Alphaproteobacteria	Rhodobacterales	Rhodobacteraceae	Rhodobacter	Unclassified	0.000570017	0.000528103	0.00039681	0.000864066	0.00109792	0.000926252	0.00128498	0.00107372	0.000930527	0.00398689	0.00359874	0.00326252	0.0011773	0.00304308	0.000959693	0.000763199	0.000573469	0.000459559	0.0512114	0.0494316	0.0447371	0.00950567	0.00934932	0.00634781	0.0138113	0.0121575	0.00987272	0.000808347	0.000598982	0.000538845	0.000457308	0.000520282	0.000575098	0.00083696	0.00112303	0.00102257	0.00119742	0.000953363	0.00120717	0.00157417	0.00149843	0.00232567
OTU_2906	Bacteria	Proteobacteria	Gammaproteobacteria	Betaproteobacteriales	Burkholderiaceae	Unclassified	Unclassified	0.00765723	0.00841192	0.00629228	0.00590139	0.00704185	0.00759527	0.00561235	0.00677552	0.00768615	0.00874049	0.00725371	0.00641507	0.0073676	0.011851	0.0129841	0.00717407	0.00680763	0.00716146	0.0135565	0.0111564	0.0140666	0.00127605	0.00209652	0.00173469	0.00421648	0.00310648	0.00266881	0.00522606	0.00436134	0.00525374	0.013281	0.0150324	0.0116362	0.00477997	0.00466638	0.00463945	0.000212445	0.000466953	0.00051736	0.00126701	0.000389203	0.000415973
OTU_49	Bacteria	Cyanobacteria	Oxyphotobacteria	Synechococcales	Cyanobiaceae	Cyanobium PCC-6307	Unclassified	0.0114763	0.0113919	0.00925891	0.0103504	0.0102978	0.00739149	0.0103932	0.0110334	0.00960304	0.000709206	0.000393612	0.000366576	0.00413953	0.00597274	0.00445975	0.00267119	0.00301534	0.00354243	0.000277418	0.000482542	0.000410432	0.00166442	0.00288979	0.00238281	0.0108129	0.0106618	0.00824904	0.0139675	0.0156671	0.0154533	0.00748842	0.00869614	0.00789802	0.0101179	0.0121016	0.0117785	0.0010236	0.00118684	0.00220357	0.00178534	0.000700566	0.00107775
OTU_21	Bacteria	Proteobacteria	Gammaproteobacteria	Betaproteobacteriales	Burkholderiaceae	uncultured	uncultured Burkholderiales bacterium	0.000589018	0.000660128	0.000604663	0.000533147	0.00064361	0.000666901	0.000642491	0.000499833	0.000539706	1.91677e-05	1.87434e-05	3.66576e-05	0.0015001	0.000359121	0.000319898	0.0021942	0.00157241	0.000880821	9.24727e-05	0.000154413	0.000261184	0.000980156	0.000415526	0.0001525	0.000243619	9.58791e-05	7.46519e-05	0.00060156	0.000467954	0.000365645	0.000419199	0.000353048	0.000383399	0.000260388	0.000387252	0.000321921	0.0040944	0.00381345	0.00402391	0.00334031	0.00354175	0.00255256
OTU_29	Bacteria	Proteobacteria	Gammaproteobacteria	Betaproteobacteriales	Burkholderiaceae	MWH-UniP1 aquatic group	uncultured bacterium	0.00647919	0.00690306	0.00491289	0.00345626	0.00427812	0.00366796	0.00281562	0.00331371	0.00420598	0.00747542	0.00671015	0.00511373	0.00313313	0.00584044	0.0062286	0.00528515	0.00299684	0.00478707	0.00397633	0.00387963	0.00408567	0.00380966	0.00411748	0.00297375	0.0115625	0.0114288	0.00920085	0.0100949	0.00900344	0.0100071	0.0126522	0.0165933	0.0140132	0.011922	0.0102041	0.0113051	1.93132e-05	0	3.8323e-05	1.91972e-05	0	3.78158e-05
OTU_45	Bacteria	Proteobacteria	Alphaproteobacteria	Rhizobiales	Rhizobiales Incertae Sedis	uncultured	uncultured bacterium	0.00351511	0.0041871	0.00343902	0.00715152	0.00637931	0.00835479	0.00549897	0.00688659	0.00541567	0.00352686	0.00320513	0.0041423	0.00601941	0.00661538	0.00668022	0.00530423	0.0073071	0.00536152	0.000702793	0.000193017	0.000596993	0.00218224	0.00283313	0.00202063	0.000768337	0.000786209	0.000503901	0.00417332	0.00295747	0.00409907	0.00289629	0.00328892	0.00364229	0.0083138	0.00789993	0.0069497	0.000849782	0.000622604	0.00076646	0.000767887	0.000564345	0.000926486
OTU_19	Bacteria	Bacteroidetes	Ignavibacteria	OPB56	metagenome	metagenome	metagenome	0.0119894	0.0131648	0.00924001	0.00455933	0.00399417	0.00492766	0.00264555	0.00375801	0.00348017	0.000881716	0.0012933	0.000953097	0.0045193	0.00531121	0.0034436	0.00507527	0.00675213	0.00647212	0.00294063	0.00181436	0.00274243	0.00135003	0.00237983	0.00224938	0.00324201	0.00354753	0.00326602	0.0113545	0.00937781	0.0111425	0.00624988	0.00694948	0.00684367	0.00874158	0.0076095	0.0068929	3.86264e-05	9.72819e-05	1.91615e-05	0.000191972	5.83805e-05	0.000207987
OTU_16991	Bacteria	Cyanobacteria	Oxyphotobacteria	Synechococcales	Cyanobiaceae	Cyanobium PCC-6307	uncultured bacterium	0.00226107	0.00273482	0.00207853	0.00836489	0.00889697	0.00427928	0.00181409	0.0025547	0.00174939	0.00153342	0.00116209	0.000641507	0.0058675	0.00735252	0.00425276	0.00223236	0.00288584	0.00266161	0.000628814	0.000308827	0.000951457	0.00380966	0.00251204	0.00253531	0.00397286	0.00218604	0.00207159	0.0185168	0.0208708	0.0219772	0.0124235	0.0119665	0.0130164	0.0133356	0.0118693	0.0120058	0.000135193	0.000136195	0.00013413	0.000575915	0.000155681	0.000340342
OTU_77	Bacteria	Bacteroidetes	Bacteroidia	Bacteroidales	Bacteroidetes vadinHA17	uncultured bacterium	uncultured bacterium	0.000285009	0.000490381	0.000321227	0.000386072	0.000586821	0.000537226	0.000585801	0.000481321	0.0003536	0	3.74869e-05	0	0.000398762	3.78022e-05	1.88175e-05	0.000572399	0.00018499	0.000210631	0	3.86033e-05	1.8656e-05	0.000332883	0.000113325	1.90625e-05	0.00011244	3.83516e-05	1.8663e-05	0.00045117	0.000112309	0.000250178	0.000323927	0.00037163	0.000230039	7.43965e-05	0.000348527	0.000189365	0.00432616	0.00476682	0.00342991	0.00522163	0.00741433	0.0134435
OTU_16371	Bacteria	Proteobacteria	Gammaproteobacteria	Betaproteobacteriales	Burkholderiaceae	Unclassified	Unclassified	0.00609918	0.00539419	0.0035335	0.00185682	0.00230943	0.00268613	0.00330694	0.00340627	0.00450375	0.0126124	0.0101215	0.0157811	0.00419649	0.00378022	0.00536299	0.00692603	0.00799156	0.00771676	0.00464213	0.00737324	0.00569009	0.00615834	0.00441968	0.00644313	0.00528466	0.0047556	0.00335934	0.00483128	0.00449236	0.00486885	0.00392523	0.00369772	0.00438992	0.00461258	0.00497618	0.00399561	0.00164162	0.00200401	0.00197363	0.0047801	0.00251036	0.00554001
OTU_7867	Bacteria	Proteobacteria	Deltaproteobacteria	Desulfobacterales	Desulfobacteraceae	Sva0081 sediment group	Unclassified	0.000114003	0.000113165	0.000151166	0.000110306	0.000151438	0.00011115	0.000170071	9.25617e-05	0.000111663	1.91677e-05	0	0	0.000588649	5.67033e-05	0.000112905	0.000572399	0.000258986	1.91483e-05	3.69891e-05	0.00011581	0.000354464	0.000813715	0.000245538	0.000171563	0.000431018	0.000172582	9.33149e-05	0.000225585	0.000149745	0.0001732	7.62181e-05	0.000185815	9.58497e-05	0.000167392	0.000232351	5.68096e-05	0.00235621	0.00276281	0.00237603	0.00167015	0.0023936	0.00260929
OTU_54	Bacteria	Proteobacteria	Gammaproteobacteria	Unclassified	Unclassified	Unclassified	Unclassified	0.00296409	0.00345153	0.0022108	0.0029415	0.00253658	0.00266761	0.00385495	0.00525751	0.00439209	0.0188035	0.0146761	0.0118587	0.00721569	0.00784395	0.00767754	0.00381599	0.00442126	0.00511259	0.0134085	0.0108089	0.0115481	0.0062878	0.00732836	0.00722469	0.00654023	0.00721011	0.00599082	0.00428612	0.00439877	0.00531147	0.00665003	0.00704238	0.00866481	0.00697467	0.00708671	0.00568096	1.93132e-05	1.94564e-05	1.91615e-05	5.75915e-05	5.83805e-05	9.45394e-05
OTU_40	Bacteria	Acidobacteria	Subgroup 6	uncultured soil bacterium	uncultured soil bacterium	uncultured soil bacterium	uncultured soil bacterium	0.000152005	0.000132026	9.44787e-05	0.000202228	0.000170367	0.000333451	0.000188968	0.000148099	0.00033499	5.75032e-05	5.62303e-05	3.66576e-05	0.000778535	0.000245714	0.000131723	0.00150732	0.000832455	0.000478707	1.84945e-05	3.86033e-05	0.000335808	0.000776728	0.0003022	7.625e-05	0.000206139	1.91758e-05	3.7326e-05	0.000432371	0.000262055	0.000327156	0.000400145	0.000185815	0.00015336	7.43965e-05	9.68129e-05	0.000151492	0.00500212	0.00513649	0.00404308	0.00334031	0.0039115	0.00338451
OTU_1306	Bacteria	Proteobacteria	Gammaproteobacteria	Unclassified	Unclassified	Unclassified	Unclassified	0.000228007	0.000150886	9.44787e-05	0.000110306	0.000208227	0.000296401	0.000113381	0.000203636	7.44421e-05	1.91677e-05	0	3.66576e-05	0.00123426	0.000585934	0.000338715	0.000953998	0.000517972	0.000268076	9.24727e-05	5.7905e-05	0.000690273	0.00173839	0.000831051	0.000171563	0.000299839	3.83516e-05	5.5989e-05	0.000244384	0.000112309	9.62223e-05	0.000285818	0.000278722	0.00013419	0.000223189	0.000348527	0.000151492	0.00413303	0.00346324	0.00429217	0.00193891	0.00313309	0.00204205
OTU_41	Bacteria	Bacteroidetes	Ignavibacteria	OPB56	uncultured bacterium	uncultured bacterium	uncultured bacterium	0.0034581	0.0028857	0.00239976	0.00452256	0.00494066	0.00539079	0.00755872	0.00903403	0.00872834	0.00486861	0.00537937	0.00405066	0.00590547	0.0069934	0.00551353	0.00719315	0.00690012	0.00654871	0.00393934	0.00513424	0.00535428	0.0147578	0.0163566	0.0146209	0.0136989	0.0148037	0.0160502	0.00280102	0.00194669	0.00215538	0.00224843	0.00195106	0.00189782	0.00442659	0.0039306	0.00416604	0.000251072	0.000544779	0.000287422	0.000710295	0.000389203	0.000510513
OTU_110	Bacteria	Proteobacteria	Gammaproteobacteria	Betaproteobacteriales	SC-I-84	uncultured bacterium	uncultured bacterium	0.000361011	0.000264051	0.00013227	0.00029415	0.000265016	0.000351976	9.4484e-05	0.000111074	0.000223326	3.83355e-05	5.62303e-05	5.49863e-05	0.000835501	0.000151209	0.000131723	0.00148824	0.000887952	0.000804228	3.69891e-05	7.72067e-05	0.000429088	0.00196031	0.00107659	0.000266875	0.000524718	7.67033e-05	1.8663e-05	0.000375975	0.000262055	0.000192445	0.000228654	0.000260141	0.00013419	5.57973e-05	0.000232351	0.000132556	0.00662444	0.00583692	0.00576761	0.00318673	0.00428124	0.00289291
OTU_58	Bacteria	Proteobacteria	Gammaproteobacteria	Betaproteobacteriales	Burkholderiaceae	uncultured	Unclassified	0.000513015	0.000716711	0.000604663	0.00126852	0.000851837	0.000944777	0.000699182	0.000499833	0.000558316	0	1.87434e-05	3.66576e-05	0.00028483	0.000113407	0.000169358	0.000877678	0.000517972	0.000478707	5.54836e-05	9.65083e-05	0.000466401	0.000943169	0.000661063	0.0001525	0.000299839	0.000134231	5.5989e-05	0.0015039	0.000524109	0.00119316	0.000571635	0.000780423	0.000709288	0.000483577	0.000658328	0.000340857	0.00799567	0.00842462	0.00751131	0.00531762	0.00690836	0.00436772
OTU_35	Bacteria	Proteobacteria	Gammaproteobacteria	Betaproteobacteriales	Burkholderiaceae	Unclassified	Unclassified	0.000437013	0.000433799	0.000302332	0.000165459	0.000246086	0.000296401	0.000283452	0.000518346	0.00068859	0.000153342	0.000131204	0.000128301	0.00170898	0.00103956	0.00116669	0.00118296	0.000665964	0.000574449	5.54836e-05	5.7905e-05	0.000485057	0.00186785	0.000982151	0.00053375	0.000318579	5.75275e-05	0.000130641	0.000958737	0.000636418	0.000692801	0.00108611	0.00133787	0.00107352	0.000260388	0.000561515	0.00043554	0.00216308	0.00241259	0.00293171	0.00199651	0.00136221	0.00173953
OTU_38	Bacteria	Proteobacteria	Alphaproteobacteria	Rickettsiales	Rickettsiaceae	Candidatus Megaira	uncultured bacterium	0.00636519	0.0069785	0.00589547	0.0037688	0.00268802	0.00326041	0.00627374	0.00675701	0.0051179	0.0072454	0.0055668	0.00778973	0.0119439	0.0121156	0.0122878	0.00459827	0.00571619	0.00693168	0.00212687	0.000791368	0.00166039	0.00939471	0.00613845	0.00848282	0.000356059	0.000613626	0.000578552	0.00697434	0.00801138	0.00825587	0.00504945	0.00589033	0.00801304	0.00492877	0.00458893	0.00405242	7.72529e-05	0.000136195	0.000114969	9.59859e-05	0.000116761	9.45394e-05
OTU_30	Bacteria	Proteobacteria	Gammaproteobacteria	Betaproteobacteriales	Methylophilaceae	uncultured	Unclassified	0.00494015	0.00516786	0.00440271	0.00367688	0.00456206	0.00409403	0.00381715	0.00401718	0.00437348	0.00187844	0.00148073	0.00117304	0.00269639	0.00357231	0.00306725	0.00118296	0.00107294	0.00124464	0.00719438	0.00617653	0.00869371	0.00258909	0.00366418	0.00316438	0.00809565	0.00765115	0.00528162	0.0044929	0.00419287	0.00371418	0.0375374	0.037962	0.0318221	0.00329204	0.00348527	0.00327602	5.79397e-05	3.89128e-05	7.6646e-05	1.91972e-05	3.89203e-05	3.78158e-05
OTU_25	Bacteria	Proteobacteria	Gammaproteobacteria	Betaproteobacteriales	SC-I-84	uncultured bacterium	uncultured bacterium	0.000152005	0.000113165	0.000113374	0.000238997	7.57189e-05	0.000166725	0.000132278	0.000222148	0.000316379	3.83355e-05	0	0	0.00110134	0.000245714	0.000244628	0.000934918	0.00055497	0.000325521	0.000129462	0.000135112	0.000988769	0.00120208	0.000849939	0.00022875	0.000356059	0.000115055	7.46519e-05	0.000507567	0.000243336	0.000211689	0.000228654	0.00013007	7.66798e-05	0.000148793	0.000116176	0.000113619	0.00378539	0.00354106	0.00274009	0.00297556	0.00369743	0.00313871
OTU_3314	Bacteria	Cyanobacteria	Oxyphotobacteria	Synechococcales	Cyanobiaceae	Cyanobium PCC-6307	uncultured bacterium	0.00231807	0.00254621	0.00190847	0.00240835	0.00414561	0.00390878	0.00122829	0.00151801	0.00137718	0.00272182	0.00221173	0.00185121	0.008374	0.00763604	0.00609687	0.0146343	0.0139667	0.0122166	1.84945e-05	5.7905e-05	9.32801e-05	7.39741e-05	0.000113325	7.625e-05	0.00832053	0.00659648	0.00468441	0.00894821	0.00890985	0.00923734	0.00920333	0.00904919	0.00824307	0.00680728	0.00652519	0.00785866	0.000231759	0.000175107	0.00013413	0.000806281	0.000350283	0.000434881
OTU_107	Bacteria	Actinobacteria	Acidimicrobiia	Microtrichales	Ilumatobacteraceae	CL500-29 marine group	metagenome	0.00452214	0.00518672	0.00245645	0.00238997	0.002423	0.00292696	0.00402502	0.00348032	0.00502485	0.00506028	0.00530439	0.00452721	0.00212673	0.00260835	0.00205111	0.00202248	0.00253436	0.00202972	0.00630664	0.00399544	0.00486922	0.0213785	0.0224195	0.0255056	0.00603426	0.00559934	0.00507633	0.00344017	0.00346286	0.00411831	0.00493512	0.00356765	0.00414071	0.0063609	0.00623475	0.00507499	7.72529e-05	5.83692e-05	1.91615e-05	7.67887e-05	3.89203e-05	9.45394e-05
OTU_50	Bacteria	Verrucomicrobia	Verrucomicrobiae	uncultured	metagenome	metagenome	metagenome	0.00606118	0.00537533	0.00538528	0.00481671	0.00564105	0.00678016	0.00487538	0.00388759	0.00426181	0.000306684	0.000243665	0.000164959	0.0139757	0.00833538	0.015054	0.00763199	0.00379229	0.00486366	0.00630664	0.0116968	0.00733182	0.00308842	0.00451412	0.00226844	0.000431018	0.000287637	0.000317271	0.00413573	0.0037062	0.00458018	0.00241992	0.00247134	0.00300968	0.00381282	0.00433722	0.00427965	0.000135193	7.78256e-05	0.00013413	9.59859e-05	7.78407e-05	0.00026471
OTU_22	Bacteria	Actinobacteria	Actinobacteria	Corynebacteriales	Mycobacteriaceae	Mycobacterium	uncultured bacterium	0.00134904	0.00141456	0.000982578	0.00305181	0.00302875	0.00379763	0.00313687	0.00433189	0.00552733	0.00389105	0.00402984	0.00634176	0.00159505	0.00287297	0.00159949	0.000858598	0.000795457	0.00139782	0.000443869	0.000250922	0.000354464	0.00891388	0.0151667	0.00968375	0.0105131	0.00454467	0.00348998	0.00075195	0.000673854	0.00090449	0.00135287	0.000891911	0.00182114	0.00278987	0.00333036	0.00248068	9.65661e-05	0.000136195	0.000210776	0.000422338	0.000330823	0.000642868
OTU_39	Bacteria	Actinobacteria	Thermoleophilia	Solirubrobacterales	Solirubrobacteraceae	Conexibacter	uncultured bacterium	0.0032491	0.00258393	0.00173841	0.0043571	0.0043349	0.00440896	0.00400612	0.00560924	0.00550872	0.00454275	0.00423602	0.00645173	0.00427245	0.0107547	0.00750819	0.00267119	0.00284884	0.00411688	0.000277418	7.72067e-05	0.000391776	0.0140366	0.0202474	0.0142969	0.00153667	0.000594451	0.000447912	0.00165429	0.00204028	0.002598	0.0029725	0.00163517	0.00297134	0.00195291	0.0025365	0.00270792	0.000444204	0.00021402	0.000325745	0.000403141	0.000252982	0.000302526
OTU_124	Bacteria	Proteobacteria	Gammaproteobacteria	Betaproteobacteriales	Rhodocyclaceae	uncultured	uncultured bacterium	0.000437013	0.000452659	0.000359019	0.000312534	0.000435383	0.000444601	0.000321246	0.000425784	0.000521095	7.66709e-05	7.49738e-05	3.66576e-05	0.000113932	3.78022e-05	5.64525e-05	0.000877678	0.000258986	0.000287224	7.39782e-05	5.7905e-05	0.000167904	5.54806e-05	5.66626e-05	3.8125e-05	7.49597e-05	0	1.8663e-05	0.000639158	0.000393082	0.000635067	0.0002096	0.000334467	0.000210869	0.00020459	0.000329164	0.000397667	0.00757078	0.0100784	0.00369817	0.00637346	0.0089906	0.033448
OTU_227	Bacteria	Proteobacteria	Gammaproteobacteria	Betaproteobacteriales	Burkholderiaceae	Ottowia	Unclassified	0.00098803	0.00103734	0.000566872	0.000864066	0.00115471	0.00146348	0.00124719	0.00122181	0.00133996	0.000785877	0.000693507	0.00130134	0.000626626	0.000245714	0.000432803	0.000839518	0.000406978	0.000248928	0.00120215	0.00194947	0.00138055	0.00159044	0.00137879	0.00163938	0.00391664	0.00456385	0.00358329	0.00075195	0.000430518	0.0005196	0.00184829	0.00241559	0.00187865	0.000502176	0.000619603	0.000549159	0.00417166	0.00408584	0.003085	0.00357067	0.00237414	0.00243912
OTU_27	Bacteria	Proteobacteria	Gammaproteobacteria	Betaproteobacteriales	Methylophilaceae	Candidatus Methylopumilus	uncultured bacterium	0.0031921	0.00437571	0.00411927	0.00272089	0.00306661	0.00235268	0.00264555	0.00307305	0.0029963	0.00325852	0.00331759	0.00271266	0.00438638	0.00378022	0.00498664	0.00267119	0.00216438	0.0021829	0.0044017	0.00416916	0.00369389	0.00813715	0.00770611	0.00890219	0.00565946	0.00569522	0.00408719	0.00342137	0.00365004	0.00388738	0.0118519	0.0112232	0.00941244	0.00548674	0.00513108	0.00528329	0	3.89128e-05	1.91615e-05	1.91972e-05	3.89203e-05	0
OTU_34	Bacteria	Actinobacteria	Thermoleophilia	Solirubrobacterales	67-14	Unclassified	Unclassified	0.0065362	0.00588457	0.00547976	0.00957826	0.00884018	0.00813249	0.00515883	0.0120886	0.00826308	0.00567365	0.00547308	0.0089811	0.00748153	0.0136466	0.0104625	0.00478907	0.00482824	0.00758272	5.54836e-05	1.93017e-05	0.000111936	0.00105413	0.00169988	0.00114375	0.00163037	0.000747857	0.000335934	0.00253783	0.00389338	0.00419529	0.00308683	0.00241559	0.00371897	0.00340364	0.00456957	0.00443115	0.000251072	0.000136195	0.000287422	0.00013438	0.000116761	0.000189079
OTU_32	Bacteria	Actinobacteria	Actinobacteria	Frankiales	Sporichthyaceae	hgcI clade	uncultured bacterium	0.00769523	0.00801584	0.00882431	0.0153326	0.0159199	0.0148015	0.010431	0.0115887	0.0108872	0.00308601	0.00232419	0.00207115	0.00355088	0.00357231	0.00438448	0.00793727	0.00708511	0.00660616	0	1.93017e-05	1.8656e-05	1.84935e-05	1.88875e-05	0	0	0	0	0.00234984	0.00245208	0.00288667	0.00586879	0.00590891	0.00475415	0.00530075	0.00642838	0.00585139	0	1.94564e-05	0	9.59859e-05	1.94602e-05	0
OTU_5291	Bacteria	Cyanobacteria	Oxyphotobacteria	Synechococcales	Cyanobiaceae	Cyanobium PCC-6307	uncultured bacterium	0.0065742	0.0069785	0.00631117	0.00843843	0.0082155	0.00798429	0.0023432	0.00223999	0.00199133	0.00596117	0.00504199	0.002676	0.0136908	0.0134576	0.0102367	0.00562859	0.00569769	0.00599341	0	0	5.59681e-05	0	7.55501e-05	0.000114375	0.000431018	0.000172582	0.000167967	0.00180468	0.00204028	0.00248254	0.00156247	0.00178382	0.00164861	0.0021761	0.0020718	0.00223451	0.00065665	0.000447497	0.000632329	0.00207329	0.000544885	0.00113447
OTU_82	Bacteria	Cyanobacteria	Oxyphotobacteria	Synechococcales	Cyanobiaceae	Cyanobium PCC-6307	uncultured bacterium	0.0161885	0.0166541	0.0162125	0.00853035	0.00827229	0.00272318	0.00927833	0.010441	0.010273	0.000440858	0.000299895	0.000329918	0.00119629	0.00158769	0.000922058	0.0010494	0.00112844	0.0011489	1.84945e-05	0	0	3.6987e-05	0.0001511	9.53125e-05	0.00127432	0.00122725	0.00069053	0.0180092	0.0232293	0.0203414	0.00807911	0.00694948	0.00835809	0.00435219	0.00604113	0.00732844	0.000173819	0.000175107	0.000210776	0.000364746	0.000155681	0.000283618
OTU_95	Bacteria	Proteobacteria	Deltaproteobacteria	Desulfuromonadales	Geobacteraceae	Geobacter	uncultured bacterium	0.00100703	0.000641267	0.000491289	0.000275766	0.000567891	0.000500176	0.000396833	0.000481321	0.000576927	0	0	0	0.000208875	7.56044e-05	0	0.000553319	0.000221988	7.65931e-05	1.84945e-05	3.86033e-05	1.8656e-05	0	1.88875e-05	0	0	1.91758e-05	0	0.000413573	0.0002059	0.000230934	0.000190545	0.000204396	0.000210869	0.00020459	0.000116176	5.68096e-05	0.00892271	0.0073156	0.0123017	0.00362827	0.00673322	0.00572909
OTU_69	Bacteria	Actinobacteria	Acidimicrobiia	Microtrichales	Ilumatobacteraceae	CL500-29 marine group	bacterium enrichment culture clone B18(2011)	0.00520616	0.00603546	0.00393031	0.00409972	0.0031234	0.00337156	0.00243769	0.00283239	0.00279158	0.00730291	0.00635403	0.00645173	0.00512694	0.00587824	0.00462911	0.00425483	0.00567919	0.00549556	0.00608471	0.0023741	0.00451476	0.00843304	0.00957598	0.00907375	0.00219257	0.00172582	0.00233287	0.0060532	0.00608341	0.00594654	0.0067453	0.00544438	0.00638359	0.00779303	0.00582814	0.00501818	5.79397e-05	3.89128e-05	7.6646e-05	3.83943e-05	1.94602e-05	5.67236e-05
OTU_37	Bacteria	Chloroflexi	Anaerolineae	Anaerolineales	Anaerolineaceae	uncultured	Unclassified	0.000209006	0.000282912	0.000151166	0.000514763	0.000454313	0.000463126	0.000245658	0.000203636	0.00033499	1.91677e-05	0	0	0.000360785	5.67033e-05	0.000169358	0.00196524	0.00112844	0.000631893	1.84945e-05	1.93017e-05	0.000167904	0.000499325	0.00022665	7.625e-05	5.62198e-05	1.91758e-05	1.8663e-05	0.000338378	0.000243336	0.0003464	0.000419199	0.000464537	0.000268379	0.000353383	0.000271076	0.000132556	0.00577465	0.00636224	0.00712808	0.00489528	0.00513749	0.00306308
OTU_11068	Bacteria	Proteobacteria	Gammaproteobacteria	Betaproteobacteriales	Burkholderiaceae	MWH-UniP1 aquatic group	uncultured bacterium	0.000684021	0.00047152	0.00039681	0.00106629	0.00106006	0.00122265	0.000661388	0.000814543	0.000930527	0.00423607	0.00399235	0.00298759	0.00233561	0.00497099	0.00381995	0.00173628	0.00144292	0.00227865	0.0273349	0.0220811	0.0246819	0.00558504	0.0057607	0.00794906	0.0171283	0.0171048	0.0139972	0.00332738	0.00275157	0.00288667	0.00421105	0.00438523	0.00375731	0.00172972	0.00164582	0.0015528	0	0	0	0	0	0
OTU_36	Bacteria	Fusobacteria	Fusobacteriia	Fusobacteriales	Fusobacteriaceae	Cetobacterium	uncultured bacterium	0.000741022	0.000980762	0.00170062	0.00104791	0.000776118	0.0010374	0.00109601	0.00055537	0.000595537	0.000613368	0.000412356	0.000513206	0.00560166	0.00330769	0.0033307	0.00141192	0.00135043	0.00118719	9.24727e-05	7.72067e-05	0.000167904	0.00107262	0.000396638	0.000190625	1.87399e-05	0	0	0.00169189	0.000898473	0.00107769	0.000857453	0.000613189	0.000479249	0.000613771	0.000910041	0.000416604	0.00376608	0.00344378	0.00272093	0.00261082	0.00288011	0.00276055
OTU_88	Bacteria	Actinobacteria	Acidimicrobiia	Microtrichales	Ilumatobacteraceae	CL500-29 marine group	uncultured bacterium	0.00188106	0.00199925	0.00171951	0.00305181	0.00200655	0.00276023	0.0017763	0.00257322	0.00161912	0.0128999	0.0111336	0.00909108	0.0109185	0.00837318	0.0097851	0.0109519	0.0162606	0.0150697	5.54836e-05	0	1.8656e-05	0.00233018	0.00205874	0.00287844	0.00453506	0.00400775	0.00350864	0.00812106	0.00713163	0.00806343	0.00436348	0.00427374	0.00458162	0.0105829	0.00724161	0.00670353	0	0	0	0	0	0
OTU_188	Bacteria	Actinobacteria	Actinobacteria	Micrococcales	Microbacteriaceae	Candidatus Aquiluna	Unclassified	0.00298309	0.00401735	0.00387363	0.00185682	0.00213906	0.00250088	0.00274004	0.00288793	0.00303352	7.66709e-05	1.87434e-05	0	0	0.000283516	0	0	1.8499e-05	0	0.0057518	0.00702581	0.00416029	0.0194922	0.0177354	0.0183191	0.00316705	0.00441044	0.00371393	0.000244384	0.000131027	0.000192445	0.000114327	0.000204396	0.00013419	0.000520775	0.000484065	0.000605969	0	0	0	3.83943e-05	1.94602e-05	3.78158e-05
OTU_44	Bacteria	Cyanobacteria	Oxyphotobacteria	Synechococcales	Cyanobiaceae	Cyanobium PCC-6307	uncultured cyanobacterium	3.80011e-05	1.88608e-05	1.88957e-05	0.000220613	0.000208227	0.000166725	0.000113381	0.000370247	0.000279158	0.000996722	0.00103089	0.00109973	1.89887e-05	0	0	1.908e-05	0	0	0	0	1.8656e-05	0	1.88875e-05	0	0.0198268	0.0150722	0.0109178	0.00272582	0.00301363	0.00332929	0.00282007	0.00293588	0.0035081	0.00595172	0.00534407	0.00505605	0	1.94564e-05	0	1.91972e-05	0	0
OTU_104	Bacteria	Actinobacteria	Acidimicrobiia	Microtrichales	Ilumatobacteraceae	CL500-29 marine group	uncultured bacterium	0.00201406	0.00201811	0.00154945	0.00161783	0.00170367	0.00174135	0.00243769	0.00296198	0.00286602	0.00523279	0.0047046	0.00474715	0.00307616	0.00260835	0.00222047	0.00249948	0.0036628	0.00314032	0.00360644	0.00254782	0.00270512	0.0290718	0.0251393	0.0343506	0.00357933	0.00352835	0.00279945	0.00270702	0.00269542	0.00230934	0.00274385	0.00254566	0.00251126	0.00481717	0.00439531	0.00354113	1.93132e-05	3.89128e-05	0	3.83943e-05	0	1.89079e-05
OTU_31	Bacteria	Actinobacteria	Actinobacteria	Frankiales	Sporichthyaceae	hgcI clade	uncultured bacterium	0.00224207	0.00175406	0.00179509	0.00349303	0.00253658	0.00351976	0.0070674	0.0085527	0.00696034	0.00720707	0.00577298	0.00700159	0.0137098	0.00935604	0.0108389	0.00696419	0.00769558	0.00792739	0.000443869	0.000308827	0.000466401	0.00641725	0.00477854	0.00791094	0.000936996	0.00116973	0.000746519	0.0060908	0.00660752	0.00577334	0.00482079	0.00475686	0.00573181	0.00777443	0.00668009	0.00530223	0	0	0	1.91972e-05	1.94602e-05	0
OTU_8312	Bacteria	Proteobacteria	Gammaproteobacteria	Betaproteobacteriales	Burkholderiaceae	Hydrogenophaga	uncultured bacterium	9.50029e-05	5.65824e-05	9.44787e-05	7.35375e-05	0.000170367	0.00011115	0.000869253	0.000777519	0.0012283	0.000939219	0.000449843	0.00186954	0.00119629	0.00228703	0.00114787	3.81599e-05	5.5497e-05	5.74449e-05	0.0268726	0.0439499	0.0277788	0.00127605	0.00103881	0.000819688	0.0210824	0.0297034	0.0322683	7.5195e-05	1.87182e-05	1.92445e-05	0.000114327	1.85815e-05	7.66798e-05	0.000167392	0.000116176	0.000321921	7.72529e-05	7.78256e-05	0	0.000172775	0.000155681	0.000132355
OTU_150	Bacteria	Cyanobacteria	Oxyphotobacteria	Synechococcales	Cyanobiaceae	Cyanobium PCC-6307	uncultured bacterium	0.00186206	0.00207469	0.00190847	0.00360334	0.00338842	0.00288991	0.00130388	0.00155504	0.00137718	0.000690039	0.000712251	0.00060485	0.00311414	0.00459297	0.00252155	0.00463643	0.00432876	0.00494026	0.000221935	7.72067e-05	0.000261184	0.00530764	0.00483521	0.00470844	0.00204265	0.000958791	0.000541227	0.00240624	0.00196541	0.00221311	0.00148625	0.00144936	0.00159111	0.0020087	0.00166518	0.00198834	0.000444204	0.000661517	0.000536522	0.00209249	0.000953549	0.00102103
OTU_87	Bacteria	Planctomycetes	Planctomycetacia	Pirellulales	Pirellulaceae	Pirellula	bacterium enrichment culture clone B161(2011)	0.00155805	0.00132026	0.00171951	0.000919219	0.000567891	0.000907727	0.00222982	0.00223999	0.00184244	0.00791628	0.00895936	0.00531535	0.00681693	0.0087134	0.00656731	0.00135468	0.00246037	0.00231694	0.0194748	0.00702581	0.0177792	0.00608437	0.00557182	0.00394594	0.00989468	0.00859077	0.00733455	0.00103393	0.0008236	0.00090449	0.00241992	0.00302878	0.00291383	0.00265967	0.00216861	0.0019694	0.000154506	9.72819e-05	0.000114969	9.59859e-05	0.000116761	0.000113447
OTU_80	Bacteria	Proteobacteria	Gammaproteobacteria	Betaproteobacteriales	Rhodocyclaceae	Unclassified	Unclassified	0.000361011	0.000264051	0.000188957	0.000514763	0.00066254	0.000611326	0.000907047	0.000684957	0.000986358	5.75032e-05	7.49738e-05	3.66576e-05	1.89887e-05	5.67033e-05	1.88175e-05	0.00013356	9.2495e-05	5.74449e-05	0	0	3.7312e-05	7.39741e-05	1.88875e-05	1.90625e-05	3.74799e-05	1.91758e-05	1.8663e-05	0.00045117	0.000187182	0.000384889	0.000190545	0.000222978	0.000172529	0.000260388	0.000232351	0.000170429	0.00521457	0.00568127	0.00385146	0.0081204	0.0106836	0.0245046
OTU_10475	Bacteria	Proteobacteria	Alphaproteobacteria	Rhodobacterales	Rhodobacteraceae	Tabrizicola	Unclassified	0.00032301	0.00047152	0.000245645	0.000606685	0.00066254	0.000796577	0.000377936	0.000518346	0.000521095	0.00427441	0.00245539	0.00487546	0.00129123	0.00139868	0.00233337	0.00120204	0.00194239	0.0017042	0.0126133	0.011967	0.00768628	0.00861798	0.0100859	0.00968375	0.00361681	0.00488983	0.00440446	0.00223705	0.00187182	0.0019052	0.00442065	0.00527714	0.00638359	0.00226909	0.00214925	0.00187472	0.000115879	0.000272389	0.000210776	0.000537521	0.000350283	0.000302526
OTU_46	Bacteria	Bacteroidetes	Ignavibacteria	Ignavibacteriales	Ignavibacteriaceae	Ignavibacterium	uncultured bacterium	0.000190006	0.000132026	5.66872e-05	0.000257381	0.000435383	0.000370501	0.000340142	0.000222148	0.000167495	0	0	0	0.000360785	1.89011e-05	5.64525e-05	0.000476999	0.000295984	0.00011489	1.84945e-05	1.93017e-05	5.59681e-05	0.00031439	0.0001511	1.90625e-05	0.000206139	1.91758e-05	0	0.000187988	9.35909e-05	5.77334e-05	0.000171491	0.000241559	7.66798e-05	5.57973e-05	7.74503e-05	5.68096e-05	0.00200858	0.00225694	0.00137963	0.00249563	0.00256874	0.00223113
OTU_12903	Bacteria	Actinobacteria	Actinobacteria	Corynebacteriales	Mycobacteriaceae	Mycobacterium	Unclassified	0.00114003	0.00113165	0.000604663	0.00101114	0.000586821	0.000907727	0.000831459	0.00094413	0.0015819	0.0035652	0.00286775	0.00480214	0.00233561	0.00323209	0.00255918	0.00173628	0.00292284	0.00258502	0.000295913	9.65083e-05	0.000261184	0.00384665	0.00610067	0.00459406	0.00663393	0.00291473	0.00212758	0.00176708	0.00142258	0.00221311	0.00219127	0.00102198	0.00168695	0.00187851	0.00259459	0.00164748	0.000521457	0.00021402	0.000364068	0.000556718	0.000233522	0.00035925
OTU_75	Bacteria	Actinobacteria	Actinobacteria	PeM15	metagenome	metagenome	metagenome	0.000152005	0.000169747	0.00013227	7.35375e-05	0.000132508	9.26252e-05	7.55872e-05	0.000185123	9.30527e-05	5.75032e-05	3.74869e-05	7.33151e-05	0.000721569	0.000264615	0.000169358	0.000648719	0.000499473	0.000306373	0.000110967	5.7905e-05	0.000354464	0.00123907	0.00113325	0.0004575	0.000224879	1.91758e-05	3.7326e-05	5.63963e-05	9.35909e-05	7.69778e-05	0.000285818	0.000167233	0.000287549	7.43965e-05	5.80878e-05	1.89365e-05	0.00169956	0.00169271	0.00212693	0.00122862	0.00165411	0.00100212
OTU_2490	Bacteria	Proteobacteria	Gammaproteobacteria	Betaproteobacteriales	Burkholderiaceae	MWH-UniP1 aquatic group	uncultured bacterium	0.0106023	0.0107507	0.00855977	0.00404456	0.00473243	0.00450158	0.00619815	0.00716428	0.0072395	0.00220429	0.00189309	0.00179622	0.00153808	0.00187121	0.002578	0.00240408	0.00207189	0.00227865	0.00369891	0.00357081	0.0026305	0.00421652	0.00413637	0.00549	0.00314831	0.00368176	0.00261282	0.00187988	0.00220875	0.00234782	0.00302967	0.00327034	0.00346976	0.00230629	0.00232351	0.00215876	0	0	0	0	0	0
OTU_96	Bacteria	Proteobacteria	Deltaproteobacteria	Syntrophobacterales	Syntrophaceae	uncultured	uncultured bacterium	0.000266008	0.000320634	0.00013227	0.000202228	0.000359665	0.000240825	9.4484e-05	0.000185123	0.00033499	0	0	1.83288e-05	9.49433e-05	1.89011e-05	0	0	5.5497e-05	3.82966e-05	0	0	1.8656e-05	1.84935e-05	0	0	0	3.83516e-05	0	0.000187988	7.48727e-05	9.62223e-05	0.000323927	0.000297304	9.58497e-05	0.00020459	0.000116176	0.000189365	0.0062768	0.00525322	0.00672568	0.00247644	0.00521533	0.00260929
OTU_57	Bacteria	Proteobacteria	Deltaproteobacteria	Desulfobacterales	Desulfobacteraceae	Sva0081 sediment group	uncultured soil bacterium	7.60023e-05	0.000113165	7.55829e-05	7.35375e-05	1.89297e-05	0.00011115	0.000113381	5.5537e-05	3.72211e-05	1.91677e-05	1.87434e-05	1.83288e-05	0.000303819	3.78022e-05	3.7635e-05	0.000496079	0.000240487	0.000229779	3.69891e-05	1.93017e-05	9.32801e-05	0.000536312	0.000169988	3.8125e-05	0.000168659	5.75275e-05	0	5.63963e-05	5.61545e-05	0	9.52726e-05	0.000167233	3.83399e-05	0	0.000116176	9.46826e-05	0.00142918	0.00136195	0.00116885	0.00109424	0.00108977	0.00109666
OTU_91	Bacteria	Proteobacteria	Gammaproteobacteria	Alteromonadales	Alteromonadaceae	Rheinheimera	uncultured Rheinheimera sp.	0.000532016	0.00230102	0.00124712	0.0116373	0.0017226	0.00011115	0.000604698	0.000962642	0.00204716	0.000709206	0.00217424	0.00119137	0.00205078	0.000207912	0.00415867	0.000515159	0.00092495	0.00164675	0.000721287	0.0189542	0.00277975	0.00299595	0.001511	0.00232563	0.00116188	0.0012656	0.000765182	0.00118432	0.0385033	0.00159729	0.0054877	0.00117063	0.01478	0.00619351	0.0106301	0.0271928	0	0	1.91615e-05	1.91972e-05	0	0
OTU_43	Bacteria	Cyanobacteria	Oxyphotobacteria	Nostocales	Oscillatoriaceae	Planktothricoides SR001	Planktothricoides sp. SR001	0	0	0	0	0	0	0.000132278	0	1.86105e-05	0	0	0	0	0.00236264	0	0	1.8499e-05	3.82966e-05	0.00403181	0.143141	0.0057274	7.39741e-05	1.88875e-05	0	0	0	0	0.000225585	0.000131027	0.0001732	7.62181e-05	3.7163e-05	0	0.00526355	0.00497618	0.00677928	0	0	0	1.91972e-05	0	0
OTU_61	Bacteria	Proteobacteria	Gammaproteobacteria	Aeromonadales	Aeromonadaceae	Aeromonas	Aeromonas hydrophila subsp. hydrophila	0.00442713	0.00486609	0.00459166	0.00165459	0.00263123	0.0017784	0.00262666	0.00323966	0.00256825	0.0105039	0.0230169	0.0291428	0.00296223	0.000510329	0.00178766	0.000915838	0.00073996	0.000363817	0.000166451	0.000250922	0.000522369	0.00196031	0.000679951	0.000324063	0.000505978	0.00151489	0.000522564	0.00345897	0.00342543	0.0019052	0.00200072	0.00247134	0.00239624	0.00312465	0.00439531	0.00268899	1.93132e-05	5.83692e-05	0.000114969	0.000902267	0.000233522	0.000718499
OTU_53	Bacteria	Proteobacteria	Gammaproteobacteria	Vibrionales	Vibrionaceae	Vibrio	Vibrio cholerae	7.60023e-05	5.65824e-05	5.66872e-05	0.000625069	0.000208227	0.00100035	5.66904e-05	0	9.30527e-05	0.0349044	0.0519943	0.0655987	0.00144314	0.000585934	0.000338715	0.000553319	0.000573469	0.000344669	0.000517847	0.000791368	0.00134323	9.24676e-05	9.44376e-05	1.90625e-05	0.000599678	0.000345165	0.000223956	0.000131591	0.000149745	0.000134711	0.00137193	0.000984819	0.000862647	5.57973e-05	5.80878e-05	3.7873e-05	0	0	0	7.67887e-05	3.89203e-05	1.89079e-05
OTU_48	Bacteria	Firmicutes	Clostridia	Clostridiales	Heliobacteriaceae	Hydrogenispora	uncultured Firmicutes bacterium	0.000228007	0.00022633	0.000151166	3.67688e-05	9.46486e-05	0.000129675	9.4484e-05	0.000166611	0.000130274	0	0	0	3.79773e-05	0	1.88175e-05	3.81599e-05	0	1.91483e-05	0	0	3.7312e-05	0	0	1.90625e-05	0	0	0	0.000263183	0.000168464	0.0003464	3.8109e-05	0.000167233	7.66798e-05	9.29956e-05	0.000212988	0.000170429	0.00602573	0.00507812	0.00879513	0.00132461	0.00681106	0.00172062
OTU_51	Bacteria	Chloroflexi	Anaerolineae	Caldilineales	Caldilineaceae	uncultured	uncultured bacterium	0.00243207	0.00173519	0.00211632	0.0047064	0.00371022	0.00318631	0.00256997	0.00281388	0.00243798	0.00373771	0.00382366	0.00293261	0.00396863	0.00563252	0.00402695	0.00150732	0.00170191	0.00160846	0.00902534	0.0023741	0.00912279	0.00290348	0.0024176	0.00278313	0.0147296	0.0131738	0.0101527	0.00105273	0.000561545	0.00117391	0.000666908	0.000613189	0.000900987	0.00100435	0.000871316	0.000757461	1.93132e-05	0	1.91615e-05	0.000153577	9.73009e-05	7.56315e-05
OTU_10825	Bacteria	Actinobacteria	Actinobacteria	Frankiales	Sporichthyaceae	hgcI clade	uncultured bacterium	0.00165305	0.00171633	0.00154945	0.00119498	0.00128722	0.00113003	0.00287231	0.00309156	0.00325684	0.00419773	0.00442345	0.00278597	0.00140516	0.00122857	0.00127959	0.00232776	0.00251586	0.0022212	0.00153505	0.00156343	0.0012313	0.00848852	0.0101615	0.0109991	0.0052097	0.00481313	0.00371393	0.00201147	0.00149745	0.00202067	0.0023056	0.00273148	0.00212786	0.00314325	0.00365953	0.00284048	0	0	1.91615e-05	0	0	1.89079e-05
OTU_9788	Bacteria	Planctomycetes	Planctomycetacia	Pirellulales	Pirellulaceae	uncultured	Unclassified	0.00191906	0.00275368	0.00202184	0.00292312	0.00230943	0.00376058	0.00205975	0.00201785	0.00249381	0.00446608	0.00365497	0.002676	0.00332302	0.00497099	0.00353769	0.00141192	0.00299684	0.00229779	0.0125023	0.00206528	0.00787284	0.00208977	0.00322977	0.00358375	0.00350437	0.00364341	0.00343399	0.00281981	0.00295747	0.003464	0.00299156	0.00256425	0.00289466	0.00526355	0.00400805	0.00278367	0.000212445	0.00021402	0.000249099	0.000326352	0.000136221	0.000226895
OTU_139	Bacteria	Actinobacteria	Actinobacteria	Frankiales	Sporichthyaceae	hgcI clade	uncultured bacterium	0.00266008	0.00198038	0.00258872	0.00301504	0.00263123	0.00340861	0.00479979	0.00440594	0.00420598	0.00138008	0.00125581	0.000934768	0.00400661	0.00466857	0.0037635	0.00373967	0.00406978	0.00407858	0.00307009	0.00401475	0.00317152	0.00197881	0.00243649	0.00268781	0.00770211	0.00855242	0.00597215	0.00140991	0.00112309	0.00182822	0.00232465	0.0025085	0.00281798	0.00184131	0.00195562	0.00185578	1.93132e-05	0	0	0	0	0
OTU_70	Bacteria	Proteobacteria	Alphaproteobacteria	Rhizobiales	Beijerinckiaceae	Methylocystis	uncultured bacterium	0.00131104	0.00113165	0.000774725	0.00264735	0.0026123	0.00266761	0.00173851	0.00220297	0.00275436	0.00335435	0.00329885	0.00474715	0.0020128	0.00202242	0.00173121	0.00116388	0.00155392	0.00135953	7.39782e-05	3.86033e-05	9.32801e-05	0.00147948	0.00205874	0.00112469	0.00350437	0.00151489	0.00154903	0.00127832	0.00108565	0.00128938	0.00110516	0.00172808	0.0015336	0.00184131	0.00199435	0.00185578	0.00065665	0.000408584	0.000613168	0.00122862	0.000583805	0.000642868
OTU_141	Bacteria	Chloroflexi	Chloroflexia	Chloroflexales	Chloroflexaceae	Candidatus Chloroploca	Unclassified	0.00446513	0.0013957	0.000623559	0.000864066	0.00132508	0.00153758	0.00215424	0.00157355	0.0037035	0.00115006	0.00131204	0.000733151	0.00317111	0.00621846	0.00308607	0.00269027	0.00194239	0.00260417	0.016904	0.00727673	0.0225551	0.0028665	0.00328643	0.00310719	0.000955736	0.000556099	0.000541227	0.00699314	0.00569033	0.00371418	0.00154342	0.00144936	0.00145692	0.000948555	0.00183945	0.00338964	0	1.94564e-05	1.91615e-05	5.75915e-05	3.89203e-05	0.000245802
OTU_64	Bacteria	Bacteroidetes	Bacteroidia	Flavobacteriales	Flavobacteriaceae	Actibacter	uncultured bacterium	0.000152005	3.77216e-05	3.77915e-05	0.000698606	0.00136294	0.000852152	0.000869253	0.000573883	0.000260548	3.83355e-05	1.87434e-05	1.83288e-05	0.000132921	3.78022e-05	1.88175e-05	0.00578123	0.00299684	0.0022595	5.54836e-05	3.86033e-05	0.000223872	0.00125756	0.000509963	7.625e-05	0.000168659	5.75275e-05	3.7326e-05	1.87988e-05	3.74364e-05	1.92445e-05	1.90545e-05	3.7163e-05	7.66798e-05	0	5.80878e-05	0	0.000231759	0.000175107	0.000191615	0.00172775	0.00270496	0.00238239
OTU_125	Bacteria	Chloroflexi	Anaerolineae	Caldilineales	Caldilineaceae	uncultured	uncultured bacterium	0.00245107	0.00211241	0.00213522	0.00128691	0.00143866	0.00138938	0.00317466	0.0035914	0.00396404	0.00180177	0.00125581	0.00115471	0.00879175	0.0106602	0.00553235	0.00318635	0.00292284	0.00382966	0.000832254	0.000154413	0.000764897	0.0025706	0.00158655	0.0016775	1.87399e-05	1.91758e-05	0	0.00287621	0.0022649	0.00238631	0.00156247	0.00124496	0.000996837	0.00197151	0.00302056	0.00253749	7.72529e-05	3.89128e-05	0.000306584	0.000345549	5.83805e-05	0.000170171
OTU_118	Bacteria	Chloroflexi	Anaerolineae	Anaerolineales	Anaerolineaceae	RBG-16-58-14	uncultured bacterium	0	0	1.88957e-05	0	0	5.55751e-05	3.77936e-05	3.70247e-05	1.86105e-05	0	0	0	0.000151909	1.89011e-05	3.7635e-05	0	1.8499e-05	3.82966e-05	0	3.86033e-05	1.8656e-05	0.000277403	0	3.8125e-05	0.000131179	3.83516e-05	0	7.5195e-05	3.74364e-05	3.84889e-05	3.8109e-05	1.85815e-05	1.91699e-05	3.71982e-05	0	3.7873e-05	0.000405578	0.000369671	0.000555683	0.000345549	0.000486504	0.000189079
OTU_62	Bacteria	Bacteroidetes	Bacteroidia	Flavobacteriales	Unclassified	Unclassified	Unclassified	0.00220407	0.00230102	0.00283436	0.00365849	0.00359665	0.00372353	0.00574463	0.00455404	0.00560177	0.00300933	0.00397361	0.00245606	0.000113932	7.56044e-05	5.64525e-05	0.0024804	0.00305233	0.00268076	0.000943222	0.00131251	0.000671617	0.000443844	0.00143545	0.000972188	0.00011244	0.000134231	0.000111978	0.00315819	0.00190925	0.00336778	0.00184829	0.00208113	0.00174446	0.000781163	0.00106494	0.00121194	1.93132e-05	1.94564e-05	0	1.91972e-05	1.94602e-05	1.89079e-05
OTU_166	Bacteria	Proteobacteria	Alphaproteobacteria	Acetobacterales	Acetobacteraceae	Roseomonas	metagenome	0.000190006	0.000150886	1.88957e-05	9.19219e-05	9.46486e-05	0.000129675	0.000151174	5.5537e-05	7.44421e-05	0.00404439	0.00466712	0.00487546	0.00205078	0.00308088	0.00223928	0.00024804	0.000295984	0.000306373	0.00497503	0.00470961	0.00444013	0.00360624	0.00275758	0.00202063	0.00787077	0.0204606	0.0340599	3.75975e-05	3.74364e-05	7.69778e-05	0	1.85815e-05	3.83399e-05	0.00020459	0.000232351	0.000227238	0	0	0	1.91972e-05	1.94602e-05	1.89079e-05
OTU_692	Bacteria	Cyanobacteria	Oxyphotobacteria	Synechococcales	Cyanobiaceae	Cyanobium PCC-6307	uncultured bacterium	0.000228007	0.000207469	0.000283436	0.000312534	0.000548962	0.000351976	0.000245658	0.000185123	0.000241937	0.00141841	0.000937172	0.00142964	0	1.89011e-05	1.88175e-05	7.63199e-05	3.6998e-05	1.91483e-05	1.84945e-05	0	0	0	0	0	0.00715865	0.00481313	0.00390056	0.00432371	0.00436134	0.00513827	0.00720261	0.00587175	0.00749545	0.00444519	0.00408551	0.00452583	0	0	0	3.83943e-05	0	3.78158e-05
OTU_68	Bacteria	Proteobacteria	Gammaproteobacteria	Betaproteobacteriales	Methylophilaceae	OM43 clade	uncultured bacterium	0.00277408	0.00330064	0.0026643	0.00238997	0.00340735	0.00296401	0.00217313	0.0027028	0.0029963	0.000460026	0.000730994	0.000384904	0.00427245	0.00332659	0.00397049	0.00375875	0.00203489	0.00239354	0	0	3.7312e-05	1.84935e-05	3.7775e-05	0	0	0	0	0.0029702	0.00284516	0.00323307	0.0112041	0.0111303	0.00782134	0.00371982	0.00352399	0.00335176	0	0	1.91615e-05	1.91972e-05	0	1.89079e-05
OTU_122	Bacteria	Proteobacteria	Alphaproteobacteria	Rhodobacterales	Rhodobacteraceae	Rhodobacter	uncultured alpha proteobacterium	0.00446513	0.0047152	0.00525301	0.0031805	0.00333163	0.00337156	0.00266445	0.00257322	0.00215882	7.66709e-05	0	5.49863e-05	0.000208875	3.78022e-05	7.527e-05	0.000305279	0.000240487	0.000287224	0.000221935	0.000212318	0.000317152	0.000795221	0.000793276	0.00038125	0.000149919	5.75275e-05	7.46519e-05	0.000864743	0.000561545	0.000635067	0.0031821	0.00384637	0.00322055	0.000223189	0.000271076	0.000132556	0.000366951	0.000564235	0.000479037	0.0013822	0.00136221	0.00155045
OTU_237	Bacteria	Cyanobacteria	Oxyphotobacteria	Chloroplast	Nannochloropsis gaditana	Nannochloropsis gaditana	Nannochloropsis gaditana	0.00117804	0.00152773	0.00166282	0.00220613	0.00219585	0.00292696	0.000831459	0.000814543	0.000949137	0.000996722	0.00110586	0.00258436	0.00085449	0.00258945	0.000771518	0.00179352	0.00377379	0.0027382	0.000850749	0.000308827	0.00121264	0.00547408	0.00840495	0.0102556	0.00202391	0.00189841	0.00203427	0.00206786	0.00351902	0.00265574	0.00341076	0.00343758	0.00385316	0.0020645	0.00203307	0.00168535	0.000115879	7.78256e-05	0.000229938	0.000345549	0.000214062	0.000151263
OTU_109	Bacteria	Actinobacteria	Actinobacteria	Micrococcales	Microbacteriaceae	Unclassified	Unclassified	0.00701121	0.00812901	0.0061789	0.00398941	0.00367236	0.00457568	0.00718079	0.00670147	0.00770476	0	0	1.83288e-05	1.89887e-05	0	0	0.00015264	0.000110994	7.65931e-05	0	0	0	1.84935e-05	0	1.90625e-05	0	0	0	0.000695554	0.0004118	0.000538845	0.000266763	0.000222978	0.000210869	0.000278987	0.000348527	0.000284048	0.000811155	0.000836625	0.000747298	0.00101745	0.000934088	0.00103993
OTU_79	Bacteria	Firmicutes	Clostridia	Clostridiales	Clostridiaceae 1	Clostridium sensu stricto 1	Clostridium perfringens	0.00140604	0.00122595	0.00160614	0.00148913	0.00132508	0.0017043	0.00132278	0.00185123	0.00167495	0.00017251	9.37172e-05	0.000238274	0.000664603	0.00117187	0.000413985	0.000763199	0.000684463	0.000497855	3.69891e-05	0	0	0.000110961	5.66626e-05	1.90625e-05	5.62198e-05	1.91758e-05	0	0.00105273	0.00106694	0.000962223	0.000876508	0.000650352	0.000709288	0.000706766	0.00158773	0.00147705	0.00150643	0.00134249	0.00210776	0.00343629	0.0022963	0.00242021
OTU_84	Bacteria	Proteobacteria	Gammaproteobacteria	Betaproteobacteriales	Burkholderiaceae	Unclassified	Unclassified	0.00034201	0.00022633	0.000321227	0.000165459	0.000113578	0.000277876	0.000302349	0.000166611	0.000744421	0.000153342	0.000206178	0.000183288	0.000246853	9.45055e-05	0.000545708	5.72399e-05	0.000166491	7.65931e-05	1.84945e-05	3.86033e-05	0	0.000184935	0.000132213	5.71875e-05	0.000168659	7.67033e-05	0.000130641	0.000206786	0.000149745	0.0001732	0.000114327	0.00013007	0.000210869	7.43965e-05	0.000154901	0.000132556	0.000212445	0.000291846	0.000344907	0.000460732	0.000272442	0.000397065
OTU_72	Bacteria	Proteobacteria	Alphaproteobacteria	Rhizobiales	Rhizobiales Incertae Sedis	Alsobacter	uncultured alpha proteobacterium	0.00121604	0.000886458	0.00122822	0.00121337	0.00111685	0.0013338	0.000529111	0.000499833	0.000614148	0.00139924	0.00125581	0.00177789	0.000246853	0.000283516	0.000508073	9.53998e-05	0.00018499	3.82966e-05	1.84945e-05	0	0	0.0025706	0.00275758	0.002745	0.00564072	0.00542676	0.00464708	0.00189867	0.00157233	0.00205916	0.00154342	0.00144936	0.00145692	0.00293866	0.00265267	0.00310559	1.93132e-05	3.89128e-05	0	3.83943e-05	0	0
OTU_71	Bacteria	Planctomycetes	Planctomycetacia	Gemmatales	Gemmataceae	uncultured	bacterium enrichment culture clone B145(2011)	0.0033631	0.00345153	0.00338234	0.00869581	0.00810192	0.00894759	0.00525331	0.00686808	0.00558316	0.00197428	0.00230544	0.00186954	0.0013482	0.00139868	0.00129841	0.00751751	0.00939749	0.0101869	1.84945e-05	1.93017e-05	0	0	0	0	0	0	0	0.00218066	0.00200285	0.00234782	0.00161963	0.00178382	0.00193616	0.00251088	0.00187817	0.00189365	0	1.94564e-05	1.91615e-05	7.67887e-05	5.83805e-05	1.89079e-05
OTU_16557	Bacteria	Verrucomicrobia	Verrucomicrobiae	Chthoniobacterales	Chthoniobacteraceae	LD29	marine metagenome	0.00098803	0.000980762	0.00111485	0.00154429	0.000832907	0.00127823	0.000774769	0.00103669	0.000651369	0.0102356	0.00991528	0.00720321	0.00734861	0.00627516	0.00660495	0.00419759	0.00532771	0.00495941	3.69891e-05	3.86033e-05	9.32801e-05	9.24676e-05	0.000113325	5.71875e-05	0.00522844	0.00387352	0.00341533	0.00174828	0.00172207	0.00178974	0.00108611	0.00102198	0.000843477	0.00159952	0.00156837	0.00117406	7.72529e-05	5.83692e-05	1.91615e-05	5.75915e-05	0	1.89079e-05
OTU_90	Bacteria	Bacteroidetes	Bacteroidia	Chitinophagales	Saprospiraceae	Candidatus Aquirestis	uncultured bacterium	0.00108303	0.00145228	0.0017573	0.00167298	0.00109792	0.000815102	0.00200306	0.00151801	0.00113524	0.00277932	0.00202429	0.00144797	0.00546874	0.00602945	0.00538181	0.00270935	0.00338532	0.00379136	0	0	5.59681e-05	0	0	0	0	0	0	0.000864743	0.00117925	0.00105845	0.00114327	0.00105914	0.00157194	0.000948555	0.000871316	0.000852144	0.000115879	1.94564e-05	5.74845e-05	7.67887e-05	1.94602e-05	9.45394e-05
OTU_6753	Bacteria	Cyanobacteria	Oxyphotobacteria	Synechococcales	Cyanobiaceae	Cyanobium PCC-6307	Unclassified	0.000114003	9.4304e-05	3.77915e-05	0	7.57189e-05	0	7.55872e-05	3.70247e-05	5.58316e-05	9.58387e-05	0.000112461	9.16439e-05	0.00028483	0.000396923	0.00015054	0.000362519	0.000406978	0.000459559	3.69891e-05	0	1.8656e-05	1.84935e-05	1.88875e-05	0	0.000318579	0.000345165	0.000298608	0.000770749	0.000561545	0.000808267	0.000457308	0.000464537	0.000517588	0.000260388	0.000251714	0.00037873	0	0	0	0	0	0
OTU_9509	Bacteria	Proteobacteria	Gammaproteobacteria	Betaproteobacteriales	Burkholderiaceae	Unclassified	Unclassified	0.000133004	0.000207469	0.000151166	5.51531e-05	0.000208227	0.0002223	0.000453523	0.000425784	0.000428042	0.00185927	0.00159319	0.0012097	0.000531683	0.00508439	0.00991683	3.81599e-05	7.3996e-05	7.65931e-05	0.00040688	0.00046324	0.000447744	0.00236717	0.00275758	0.0025925	0.00505978	0.00488983	0.00416185	5.63963e-05	1.87182e-05	3.84889e-05	0.00102894	0.00183957	0.00126522	9.29956e-05	5.80878e-05	0.000113619	3.86264e-05	3.89128e-05	7.6646e-05	5.75915e-05	0	3.78158e-05
OTU_81	Bacteria	Planctomycetes	Planctomycetacia	Pirellulales	Pirellulaceae	Rhodopirellula	Unclassified	0.000456014	0.000433799	0.000245645	0.000220613	0.000246086	0.000611326	0.000396833	0.000222148	0.00033499	0.00138008	0.00149948	0.000971425	0.00110134	0.00172	0.00097851	0.000648719	0.000887952	0.0010723	0.0100425	0.00248991	0.00958919	0.000610286	0.000623288	0.000819688	0.0117687	0.0102399	0.00808107	0.000545164	0.000280773	0.000442623	0.000362036	0.000334467	0.000287549	0.00145073	0.0010843	0.00102257	0.000173819	9.72819e-05	5.74845e-05	7.67887e-05	9.73009e-05	0.000113447
OTU_83	Bacteria	Planctomycetes	Phycisphaerae	Phycisphaerales	Phycisphaeraceae	CL500-3	uncultured marine bacterium	0.00296409	0.00237646	0.0017573	0.00362172	0.00507316	0.00485356	0.0041195	0.00470214	0.00519234	0.00254931	0.00217424	0.00150296	0.00056966	0.000434725	0.000545708	0.00263304	0.00268235	0.00306373	0	1.93017e-05	1.8656e-05	0	0	0	0	0	0	0.000469969	0.000262055	0.000442623	0.00201978	0.00195106	0.00193616	0.00197151	0.00224606	0.00191259	0.000714589	0.000583692	0.00101556	0.00113263	0.00136221	0.00105884
OTU_273	Bacteria	Verrucomicrobia	Verrucomicrobiae	Verrucomicrobiales	Rubritaleaceae	Luteolibacter	uncultured bacterium	0.000152005	5.65824e-05	3.77915e-05	0.000827297	0.000719329	0.00113003	0.0012094	0.00116628	0.00126552	0.00164843	0.00159319	0.00128301	0.00125325	0.00198461	0.00133604	0.00101124	0.00151692	0.00139782	0.0164971	0.0081646	0.0196821	0.00271855	0.00321088	0.00181094	1.87399e-05	1.91758e-05	0	0.000112793	0	9.62223e-05	5.71635e-05	0	3.83399e-05	5.57973e-05	0	3.7873e-05	0.000231759	0.000233477	0.000325745	0.000441535	0.000155681	0.000207987
OTU_15253	Bacteria	Proteobacteria	Gammaproteobacteria	Betaproteobacteriales	Burkholderiaceae	Unclassified	Unclassified	0.000285009	0.000358355	0.000188957	0.000110306	0.000208227	0.0001482	0.000529111	0.000388759	0.000632758	0.000498361	0.000356125	0.000311589	0.000531683	0.000945055	0.000790335	0.000591479	0.00073996	0.000651042	0.00991308	0.0245324	0.00901086	0.00488229	0.00523184	0.00751063	0.00217383	0.00220522	0.00119443	0.000112793	7.48727e-05	9.62223e-05	0.000266763	0.000204396	0.000172529	0.000260388	0.000348527	0.00037873	0	3.89128e-05	1.91615e-05	5.75915e-05	0.000214062	9.45394e-05
OTU_116	Bacteria	Bacteroidetes	Bacteroidia	Flavobacteriales	Flavobacteriaceae	Flavobacterium	uncultured prokaryote	0.000646019	0.00122595	0.000982578	0.00748244	0.00119257	0.000277876	0.00137947	0.0016476	0.00472708	0.00170593	0.0017244	0.00155795	0.00140516	0.000283516	0.00536299	0.000820438	0.0018684	0.00124464	0.000480858	0.00312687	0.000223872	0.00689808	0.00387194	0.0123334	0.000299839	0.00107385	0.000522564	0.0015791	0.00643905	0.000750534	0.000457308	0.000148652	0.000421739	0.00258528	0.00288502	0.0053401	3.86264e-05	1.94564e-05	1.91615e-05	1.91972e-05	1.94602e-05	5.67236e-05
OTU_230	Bacteria	Proteobacteria	Gammaproteobacteria	Pseudomonadales	Pseudomonadaceae	Pseudomonas	Pseudomonas sp.	0.000266008	3.77216e-05	0.00810627	0.000367688	0.000473243	0.000166725	0.00041573	0.00062942	0.00872834	0.000575032	0.00151822	0.00256603	0.000740558	0.000226813	0.0199089	0.000953998	0.00160941	1.91483e-05	0	0	1.8656e-05	0	9.44376e-05	0	1.87399e-05	0	1.8663e-05	3.75975e-05	0	5.77334e-05	7.62181e-05	0.000408793	0.0111761	0	0.000638965	0.0366422	5.79397e-05	1.94564e-05	1.91615e-05	3.83943e-05	1.94602e-05	3.78158e-05
OTU_257	Bacteria	Bacteroidetes	Bacteroidia	Flavobacteriales	Crocinitomicaceae	Fluviicola	uncultured Flexibacter sp.	0.00157705	0.00186722	0.00145497	0.00045961	0.00068147	0.000537226	0.00147395	0.00142545	0.00120968	0.00109256	0.00112461	0.00153962	0.000417751	0.000642637	0.000263445	0.00301463	0.00246037	0.00314032	0.00403181	0.00372522	0.00248125	0.00264457	0.00249315	0.00356469	0.000524718	0.000632802	0.000597215	0.000357176	0.000467954	0.000423378	0.000152436	0.000278722	0.000268379	0.00104155	0.00131666	0.00124981	0	3.89128e-05	1.91615e-05	3.83943e-05	0	1.89079e-05
OTU_100	Bacteria	Cyanobacteria	Oxyphotobacteria	Phormidesmiales	Nodosilineaceae	Nodosilinea PCC-7104	Unclassified	0.0120464	0.0111279	0.0102037	0.000110306	0.000170367	0.00011115	0.000548007	0.000851568	0.000781643	0.00398689	0.00288649	0.00192452	0.00199381	0.00432835	0.00340597	0.00139284	0.000776958	0.0010723	0	0	0	0	0	0	0.000262359	0.000325989	0.000130641	0.00464329	0.00449236	0.00500356	0.00596406	0.00670792	0.00611521	0.00165532	0.00178136	0.00187472	0	0	0	0	0	0
OTU_97	Bacteria	Planctomycetes	OM190	uncultured bacterium	uncultured bacterium	uncultured bacterium	uncultured bacterium	0.00159605	0.00120709	0.00113374	0.00101114	0.00117364	0.000889202	0.000869253	0.000962642	0.000930527	0.00153342	0.00149948	0.0010814	0.00208875	0.00196571	0.00127959	0.00236592	0.0018314	0.00239354	0.00159053	0.00156343	0.00121264	0.0011281	0.00117103	0.00108656	0.0109441	0.00953038	0.00686798	0.0014851	0.00149745	0.00144333	0.00120043	0.00124496	0.00122688	0.00107875	0.00143283	0.00113619	0.000405578	0.000350215	0.000191615	0.000307155	0.000214062	0.000378158
OTU_296	Bacteria	Proteobacteria	Gammaproteobacteria	Legionellales	Legionellaceae	Legionella	uncultured bacterium	0.000798024	0.000678989	0.000963682	0.0023532	0.00206334	0.00248235	0.00285342	0.00231404	0.0022891	0.00166759	0.00153696	0.00157628	0.000949433	0.00109626	0.00097851	0.00202248	0.00379229	0.00292969	0.000221935	0.000173715	0.000391776	0.000499325	0.000717726	0.000514688	0.000337319	0.000441044	0.000317271	0.0030642	0.00228362	0.00271347	0.00314399	0.00314027	0.00316304	0.00455678	0.00334973	0.00255643	0.000115879	1.94564e-05	1.91615e-05	3.83943e-05	0.000116761	5.67236e-05
OTU_16246	Bacteria	Cyanobacteria	Oxyphotobacteria	Synechococcales	Cyanobiaceae	Cyanobium PCC-6307	uncultured bacterium	0.000380011	0.000848736	0.000604663	0.000165459	0.000113578	7.41001e-05	5.66904e-05	7.40494e-05	1.86105e-05	0.000153342	0.000337382	3.66576e-05	0.000341796	0.000302417	0.00015054	0.000305279	0.000277485	0.000325521	0.000277418	3.86033e-05	0.00037312	0.00236717	0.00243649	0.00223031	0.0219257	0.0129245	0.00692397	0.00127832	0.00136643	0.00165502	0.00207694	0.00169092	0.00210869	0.000762564	0.000406614	0.000624905	5.79397e-05	7.78256e-05	5.74845e-05	0	1.94602e-05	0
OTU_4294	Bacteria	Proteobacteria	Gammaproteobacteria	Betaproteobacteriales	Rhodocyclaceae	Uliginosibacterium	uncultured bacterium	0.000190006	0.000188608	3.77915e-05	0.000147075	0.000454313	0.00018525	0.000170071	0.000148099	0.000186105	0	0	0	3.79773e-05	0	0	9.53998e-05	5.5497e-05	0	0	0	0	1.84935e-05	1.88875e-05	0	1.87399e-05	0	1.8663e-05	5.63963e-05	7.48727e-05	0.000134711	0.000152436	0.00013007	5.75098e-05	0	3.87252e-05	3.7873e-05	0.00293561	0.00371617	0.00325745	0.00504886	0.00603265	0.0277946
OTU_101	Bacteria	Bacteroidetes	Bacteroidia	Chitinophagales	Saprospiraceae	uncultured	uncultured soil bacterium	0.000475014	0.000358355	0.000321227	0.000220613	0.000132508	0.000296401	1.88968e-05	1.85123e-05	0	0.00387188	0.00269906	0.00227277	0.000227864	0.000491428	0.000413985	7.63199e-05	0.000462475	0.000210631	0.0071204	0.00828041	0.00830193	0	5.66626e-05	0	0.0169034	0.0146312	0.0122989	0.000263183	7.48727e-05	0.000192445	0.001048	0.00104056	0.000613438	0.000185991	9.68129e-05	0.000132556	3.86264e-05	0.000136195	0	7.67887e-05	0	1.89079e-05
OTU_103	Bacteria	Bacteroidetes	Bacteroidia	Chitinophagales	Saprospiraceae	Phaeodactylibacter	uncultured bacterium	5.70017e-05	0.000113165	9.44787e-05	1.83844e-05	1.89297e-05	1.8525e-05	0.000132278	0.000166611	0.000167495	0.00268348	0.00194932	0.00175956	1.89887e-05	0.000831648	0	5.72399e-05	9.2495e-05	1.91483e-05	0.0258184	0.0271574	0.0209321	3.6987e-05	5.66626e-05	0	0.00129305	0.00128478	0.00111978	3.75975e-05	5.61545e-05	7.69778e-05	1.90545e-05	5.57445e-05	7.66798e-05	1.85991e-05	7.74503e-05	0	0	0	0	0	0	0
OTU_115	Bacteria	Chloroflexi	Anaerolineae	Caldilineales	Caldilineaceae	uncultured	metagenome	0.000950029	0.000886458	0.000604663	0.0005883	0.000548962	0.000815102	0.000755872	0.000740494	0.000930527	0.0005942	0.000730994	0.00130134	0.00375976	0.00415824	0.00329306	0.000953998	0.0017759	0.000938266	0.0101535	0.00399544	0.0102981	0.000110961	9.44376e-05	9.53125e-05	1.87399e-05	3.83516e-05	0	0.00114672	0.00149745	0.00128938	0.00059069	0.000408793	0.000594268	0.00349663	0.00282694	0.00310559	0.000115879	0.000252933	0.000325745	0.000441535	0.000155681	0.000132355
OTU_247	Bacteria	Actinobacteria	Actinobacteria	Frankiales	Sporichthyaceae	hgcI clade	Unclassified	0.000380011	0.000377216	0.000434602	0.000808913	0.00107899	0.000926252	0.000453523	0.00062942	0.000614148	0.000287516	0.000187434	0.000201617	0.000208875	0.000283516	0.00022581	0.000305279	0.000351481	0.000344669	1.84945e-05	5.7905e-05	5.59681e-05	0.00565902	0.00602512	0.00695781	0	1.91758e-05	0	0.000263183	0.000374364	0.000423378	0.000533526	0.000538863	0.000287549	0.004222	0.00431786	0.00359794	0	0	0	0	0	3.78158e-05
OTU_121	Bacteria	Proteobacteria	Gammaproteobacteria	Methylococcales	Methylococcaceae	Methyloparacoccus	uncultured bacterium	3.80011e-05	7.54432e-05	1.88957e-05	0.0005883	0.000530032	0.000796577	0.00105822	0.000796031	0.00107941	0.000210845	0.000112461	9.16439e-05	0.00028483	0.000926153	5.64525e-05	1.908e-05	0	0	0.0112447	0.00889807	0.0257267	0.00719398	0.00657286	0.00358375	0.000918256	0.00046022	0.000261282	0	0	0	3.8109e-05	0	1.91699e-05	7.43965e-05	5.80878e-05	3.7873e-05	1.93132e-05	3.89128e-05	3.8323e-05	0.000326352	0.000194602	0.000283618
OTU_113	Bacteria	Verrucomicrobia	Verrucomicrobiae	Verrucomicrobiales	Verrucomicrobiaceae	uncultured	metagenome	0.000646019	0.00118823	0.000661351	0.00045961	0.000283946	0.000666901	0.000340142	0.000129586	0.0003536	0.00218512	0.00245539	0.00192452	0.00243055	0.00192791	0.002578	0.000515159	0.000721461	0.000727635	0.000314407	0.00011581	0.00018656	0.000240416	0.0001511	0.000133438	0.00301713	0.00209016	0.00169833	0.000939938	0.00108565	0.000885245	0.000762181	0.000817586	0.00126522	0.000595172	0.000484065	0.000321921	0	1.94564e-05	1.91615e-05	0.00013438	1.94602e-05	9.45394e-05
OTU_160	Bacteria	Proteobacteria	Deltaproteobacteria	Desulfobacterales	Desulfobacteraceae	Desulfobacterium	Unclassified	1.90006e-05	0	0	0	0	1.8525e-05	1.88968e-05	0	1.86105e-05	1.91677e-05	0	0	0	0	1.88175e-05	0	1.8499e-05	1.91483e-05	3.69891e-05	0.000135112	0.000522369	0.000776728	0.000415526	0.0001525	0.000393538	5.75275e-05	1.8663e-05	1.87988e-05	1.87182e-05	0	0	0	0	1.85991e-05	0	1.89365e-05	7.72529e-05	1.94564e-05	3.8323e-05	0.000115183	0.000155681	5.67236e-05
OTU_765	Bacteria	Bacteroidetes	Bacteroidia	Chitinophagales	Chitinophagaceae	Sediminibacterium	uncultured bacterium	7.60023e-05	0.000188608	0.000188957	7.35375e-05	0.000208227	7.41001e-05	0.000188968	0.000111074	0.000111663	3.83355e-05	3.74869e-05	9.16439e-05	0	0	3.7635e-05	1.908e-05	0	0	0.000369891	0.000791368	0.000335808	0.00950567	0.00851827	0.0144684	0.000243619	0.000249286	0.00018663	1.87988e-05	0	5.77334e-05	0	1.85815e-05	3.83399e-05	5.57973e-05	1.93626e-05	1.89365e-05	0	0	0	0	0	0
OTU_119	Bacteria	Verrucomicrobia	Verrucomicrobiae	uncultured	uncultured bacterium	uncultured bacterium	uncultured bacterium	0.00222307	0.00199925	0.0013416	0.000477994	0.000700399	0.000555751	0.00158733	0.000907105	0.00130274	0	0	0	0.00220268	0.00120967	0.00212638	0.00309095	0.0018314	0.00258502	1.84945e-05	1.93017e-05	0	0	1.88875e-05	0	0	0	0	0.00105273	0.000954627	0.000923734	0.00097178	0.000761841	0.000575098	0.00159952	0.00278821	0.002386	0.000115879	0.000136195	0.000114969	7.67887e-05	7.78407e-05	0.000113447
OTU_16114	Bacteria	Cyanobacteria	Oxyphotobacteria	Synechococcales	Cyanobiaceae	Cyanobium PCC-6307	uncultured Synechococcus sp.	5.70017e-05	7.54432e-05	7.55829e-05	0.000441225	0.000302875	0.000240825	0.00041573	0.000425784	0.000260548	0.000383355	0.000374869	0.000494877	7.59547e-05	3.78022e-05	5.64525e-05	0.000267119	0.000147992	0.000191483	0	0	0	0	0	0	0.00573442	0.00421868	0.00347131	0.0015415	0.00207772	0.00178974	0.00428727	0.00486835	0.00623023	0.00195291	0.00178136	0.00189365	0	0	0	1.91972e-05	1.94602e-05	0
OTU_189	Bacteria	Planctomycetes	Planctomycetacia	Pirellulales	Pirellulaceae	Pirellula	uncultured bacterium	0.000114003	0.000207469	0.00013227	0.000404456	0.000302875	0.000463126	0.000132278	0.000148099	0.000186105	0.000977555	0.000899685	0.000843124	0.00193684	0.00221143	0.00208874	0.0022896	0.00283035	0.00266161	0.00761975	0.00258642	0.00639901	0.000332883	0.000396638	0.000266875	0.0125932	0.0106809	0.00920085	0.000206786	0.000149745	0.000250178	5.71635e-05	0.000167233	0.00015336	0.000483577	0.000387252	0.00037873	0	0	0	1.91972e-05	0	0
OTU_280	Bacteria	Bacteroidetes	Bacteroidia	Cytophagales	Cyclobacteriaceae	Algoriphagus	uncultured bacterium	3.80011e-05	9.4304e-05	0.000113374	0.000441225	0.000870767	0.000722476	0.000642491	0.000796031	0.000632758	0.000785877	0.000524816	0.000531535	0.00028483	0.000321319	0.000263445	0.00015264	0.000295984	0.000229779	0.000443869	0.000675558	0.000298496	0.00258909	0.00277647	0.00341219	0.00174281	0.00224357	0.00171699	0.000526365	0.000262055	0.0003464	0.000476363	0.0005017	0.000268379	0.000316185	0.000116176	0.000132556	0	0	1.91615e-05	0	0	0
OTU_197	Bacteria	Chloroflexi	Chloroflexia	Chloroflexales	Roseiflexaceae	uncultured	uncultured Roseiflexus sp.	0.000684021	0.000792154	0.000529081	0.000772144	0.000776118	0.000722476	1.88968e-05	3.70247e-05	1.86105e-05	0.000651703	0.00054356	0.00060485	0.000398762	0.000718241	0.000282263	0.00013356	0.000166491	0.000382966	0.00140559	0.000752765	0.00110071	0.00294047	0.00264425	0.00202063	0.00380421	0.00314483	0.00203427	0.00180468	0.00194669	0.00198218	7.62181e-05	1.85815e-05	0.00015336	0.00189711	0.00156837	0.00149599	1.93132e-05	0	0	0	0	0
OTU_135	Bacteria	Bacteroidetes	Bacteroidia	Chitinophagales	Saprospiraceae	Lewinella	uncultured bacterium	0.000266008	0.000396077	0.000377915	0.00121337	0.00106006	0.0010374	0.000812563	0.000740494	0.000781643	0.00168676	0.00200555	0.00139299	0.000341796	0.000774945	0.00052689	0.000610559	0.000776958	0.000842525	0.010246	0.0105001	0.014645	0.000110961	0.0001511	5.71875e-05	0.00136801	0.000805385	0.000970475	0.000244384	0.000168464	0.000250178	0.000323927	0.000408793	0.000345059	0.000371982	0.000271076	0.00037873	7.72529e-05	5.83692e-05	3.8323e-05	0.000230366	3.89203e-05	5.67236e-05
OTU_127	Bacteria	Proteobacteria	Gammaproteobacteria	Legionellales	Legionellaceae	Legionella	uncultured bacterium	9.50029e-05	3.77216e-05	0.000170062	0.000147075	1.89297e-05	9.26252e-05	0.0210132	0.0210671	0.0160237	1.91677e-05	5.62303e-05	5.49863e-05	0.00112033	0.000604835	0.00090324	0.000801358	0.000795457	0.000765931	0	0	0	0	0	0	0	0	0	0.000808347	0.00106694	0.000885245	0.000171491	0.000167233	0.00013419	0.000241788	0.000290439	0.000397667	5.79397e-05	0	9.58075e-05	0.000191972	7.78407e-05	0.000151263
OTU_156	Bacteria	Bacteroidetes	Bacteroidia	Flavobacteriales	Crocinitomicaceae	Wandonia	Unclassified	0	1.88608e-05	0	0	0	0	0	0	0	5.75032e-05	1.87434e-05	0	0	0.000226813	0	0	0	0	0.00841502	0.0306703	0.00591396	0.00118359	0.00219095	0.00175375	0.000356059	0.00136148	0.000746519	0	0	0	1.90545e-05	0	0	0	0	0	0	0	0	0	0	1.89079e-05
OTU_137	Bacteria	Bacteroidetes	Bacteroidia	Bacteroidetes VC2.1 Bac22	metagenome	metagenome	metagenome	0	0	0	0.000477994	0.000473243	0.000574276	0.000453523	0.00031471	0.000446653	0.000383355	0.000674764	0.000348247	0.000265841	0.000812747	0.000244628	1.908e-05	1.8499e-05	3.82966e-05	0.016941	0.0113687	0.0137681	0.00410556	0.00481632	0.00438438	3.74799e-05	0.000153407	7.46519e-05	0	0	0	0	0	0	1.85991e-05	3.87252e-05	5.68096e-05	0	0	0	0	3.89203e-05	1.89079e-05
OTU_14557	Bacteria	Cyanobacteria	Oxyphotobacteria	Chloroplast	Discoplastis sp. Banmun010910B	Discoplastis sp. Banmun010910B	Discoplastis sp. Banmun010910B	0.00359111	0.00294229	0.00459166	0.0075376	0.0102788	0.00663196	0.00916495	0.0049428	0.00528539	0	0	3.66576e-05	1.89887e-05	0	0	3.81599e-05	0	3.82966e-05	0	0	0	0	0	0	0	0	0	0.0014663	0.00222746	0.00165502	0.00203883	0.00217403	0.00201284	0.000409181	0.000464702	0.000246175	0	1.94564e-05	0	3.83943e-05	0.000116761	0.000132355
OTU_146	Bacteria	Bacteroidetes	Bacteroidia	Flavobacteriales	Flavobacteriaceae	Flavobacterium	uncultured bacterium	0	0	0	0	0	0	0	0	0	0.00017251	0.000131204	0.00014663	0	0.000113407	0	0	0	0	0.0054374	0.00729603	0.00391776	0.0118913	0.0100104	0.01891	0.000993216	0.00207099	0.00125042	0	0	0	0	0	0	0	1.93626e-05	0	0	0	0	0	0	0
OTU_165	Bacteria	Bacteroidetes	Bacteroidia	Sphingobacteriales	NS11-12 marine group	uncultured bacterium	uncultured bacterium	0	0	0	0	0	0	1.88968e-05	0	0	0.00201261	0.00193057	0.00139299	0.00157606	0.00198461	0.0021452	0.00217512	0.00312633	0.00359988	0.0115221	0.0117547	0.00973844	0.000110961	0.000339975	0.0001525	1.87399e-05	3.83516e-05	1.8663e-05	0	0	0	0	0	0	0	0	0	0	0	0	0	0	0
OTU_151	Bacteria	Proteobacteria	Alphaproteobacteria	Unclassified	Unclassified	Unclassified	Unclassified	0.000152005	0.000132026	0.000302332	0.000312534	0.000283946	0.000611326	0.0011716	0.000814543	0.000558316	0.00299017	0.00316764	0.00639674	0	0.000189011	0	0	0	0	0.00286665	0.000656257	0.00348868	0.0153866	0.00729058	0.0142206	0.000131179	0.000153407	9.33149e-05	7.5195e-05	3.74364e-05	7.69778e-05	0	0	0	9.29956e-05	5.80878e-05	3.7873e-05	0	0	0	0	1.94602e-05	1.89079e-05
OTU_233	Bacteria	Cyanobacteria	Oxyphotobacteria	Chloroplast	Unclassified	Unclassified	Unclassified	0.000114003	9.4304e-05	7.55829e-05	0.00029415	0.000416454	0.0001482	0.000377936	0.000351735	0.000483874	0.000345019	0.000393612	0.000256603	0.000360785	0.000793846	0.000489255	0.00017172	0.000129493	5.74449e-05	0.000184945	1.93017e-05	0.000261184	0.00906182	0.0153933	0.00911188	0.000449758	0.00023011	7.46519e-05	0.000112793	0.000112309	0.000250178	0.000247709	0.000334467	0.00015336	0.000390581	0.000793866	0.000700651	5.79397e-05	0.000116738	0.000191615	0.000537521	9.73009e-05	5.67236e-05
OTU_228	Bacteria	Proteobacteria	Gammaproteobacteria	Pseudomonadales	Pseudomonadaceae	Pseudomonas	Unclassified	0	1.88608e-05	0	0.00134206	0.000700399	0	1.88968e-05	0	0.00135857	0.000268348	0.00386115	1.83288e-05	0.0025065	0.000264615	0.0342479	0.000515159	0.000258986	0.000134038	1.84945e-05	0.000193017	0.000111936	1.84935e-05	0	0	0	0	0	1.87988e-05	0.000748727	0	0.00186734	0	0.000536758	3.71982e-05	0.00689308	0.0016096	0	1.94564e-05	0	1.91972e-05	0	0
OTU_161	Bacteria	Chloroflexi	Anaerolineae	Caldilineales	Caldilineaceae	uncultured	uncultured bacterium	9.50029e-05	5.65824e-05	3.77915e-05	7.35375e-05	7.57189e-05	0.00011115	0.000226762	0.000388759	0.000223326	0.000383355	0.000224921	0.000403233	0.000930445	0.00164439	0.00067743	0.000381599	0.000702962	0.000651042	0.0108563	0.00187226	0.00949591	0.00638026	0.00458967	0.00571875	0.000655897	0.000613626	0.000503901	0.000187988	0.000262055	0.000269422	0.000438254	0.000427374	0.000555928	0.000223189	0.000425977	0.000189365	3.86264e-05	1.94564e-05	1.91615e-05	3.83943e-05	0	1.89079e-05
OTU_409	Bacteria	Cyanobacteria	Oxyphotobacteria	Chloroplast	Lepocinclis acus var. major	Lepocinclis acus var. major	Lepocinclis acus var. major	0.00252708	0.00230102	0.00372246	0.000202228	0.000302875	0.00018525	0.000812563	0.000351735	0.000390821	0.000191677	0.000168691	0.000586521	0.000512694	0.000283516	0.000319898	9.53998e-05	0.000166491	7.65931e-05	1.84945e-05	0	0	0	9.44376e-05	0	0	0	0	0.000112793	0.000243336	0.000327156	5.71635e-05	9.29074e-05	0.00011502	0.000948555	0.00118112	0.000719588	0	1.94564e-05	0	0	0	0
OTU_651	Bacteria	Bacteroidetes	Bacteroidia	Cytophagales	Cyclobacteriaceae	Algoriphagus	metagenome	9.50029e-05	9.4304e-05	0.000207853	0.0020039	0.00217692	0.0018525	5.66904e-05	1.85123e-05	7.44421e-05	0.00084338	0.000974659	0.000861453	0.000341796	0.000491428	0.000922058	0.00156456	0.00160941	0.00120634	0.000869244	0.000675558	0.000802209	0.00036987	0.000283313	0.000247813	5.62198e-05	5.75275e-05	5.5989e-05	0.00090234	0.000449236	0.00107769	0.00190545	0.00243418	0.00226205	0.000130194	9.68129e-05	0.000113619	0	0	0	0	0	0
OTU_241	Bacteria	Cyanobacteria	Oxyphotobacteria	Chloroplast	uncultured Phacus	uncultured Phacus	uncultured Phacus	0.000380011	0.000509242	0.000831412	0.000349303	0.000302875	0.0002223	0.00158733	0.000833056	0.000837474	0.000460026	0.00359874	0.00826628	0.00275336	0.00255165	0.00122314	0.00011448	9.2495e-05	0.000134038	0	0	0	0	0	1.90625e-05	1.87399e-05	0	0	1.87988e-05	5.61545e-05	7.69778e-05	5.71635e-05	3.7163e-05	1.91699e-05	0.000371982	0.000348527	0.000265111	0	0	0	0	0	0
OTU_176	Bacteria	Proteobacteria	Gammaproteobacteria	Alteromonadales	Alteromonadaceae	Rheinheimera	uncultured gamma proteobacterium	9.50029e-05	7.54432e-05	1.88957e-05	0.000110306	5.67891e-05	0.000629851	7.55872e-05	0.000111074	0.0259803	0.000325852	0.00522942	9.16439e-05	0.000227864	1.89011e-05	0.0144707	5.72399e-05	0.000110994	0	0	0.000501843	0	0	0	0	0	0	0	0	1.87182e-05	7.69778e-05	0	0	0.000191699	0	0	0.00638161	0	0	0	0	1.94602e-05	0
OTU_667	Bacteria	Proteobacteria	Gammaproteobacteria	Betaproteobacteriales	Burkholderiaceae	Polaromonas	uncultured bacterium	0.000228007	0.000339495	0.000302332	0.000257381	0.000265016	0.000259351	0.000132278	0.000166611	0.000186105	0.000306684	0.000412356	0.000109973	0.000322807	7.56044e-05	0.00314252	0.0001908	0.000110994	0.00011489	0	0	0	3.6987e-05	5.66626e-05	0	1.87399e-05	0	0	0.000225585	0.000112309	0.000404134	0.00137193	0.00159801	0.00180197	0.000576573	0.000638965	0.00092789	0	0	0	5.75915e-05	0	0
OTU_187	Bacteria	Bacteroidetes	Bacteroidia	Cytophagales	Spirosomaceae	Lacihabitans	uncultured bacterium	3.80011e-05	0	7.55829e-05	0	1.89297e-05	3.70501e-05	0	0	1.86105e-05	0	1.87434e-05	0	1.89887e-05	0	7.527e-05	1.908e-05	3.6998e-05	3.82966e-05	0	0	0	0	0	0	0	0	0	0	0	0	0	0	1.91699e-05	0	0	0	1.93132e-05	0	0	0.000115183	1.94602e-05	1.89079e-05
OTU_4427	Bacteria	Actinobacteria	Actinobacteria	Frankiales	Sporichthyaceae	hgcI clade	uncultured actinobacterium	5.70017e-05	1.88608e-05	0	0	0	1.8525e-05	3.77936e-05	1.85123e-05	0	0.000210845	0.000281152	0.000128301	0.000113932	0.000189011	9.40875e-05	5.72399e-05	0.000240487	0.000191483	0.000702793	0.00069486	0.000690273	0.00822962	0.00738502	0.0103128	0.00695251	0.00830313	0.00584151	1.87988e-05	7.48727e-05	1.92445e-05	0	1.85815e-05	0	3.71982e-05	5.80878e-05	3.7873e-05	0	0	0	0	0	0
OTU_504	Bacteria	Bacteroidetes	Bacteroidia	Flavobacteriales	Crocinitomicaceae	Fluviicola	uncultured bacterium	0.000133004	0.000414938	0.000585768	0.000349303	0.000340735	0.000240825	0	0	0	0.000824213	0.000524816	0.000476548	0.000892467	0.00232483	0.00144895	0.000476999	0.00162791	0.00379136	0.000850749	0.000366732	0.000391776	1.84935e-05	5.66626e-05	0.000114375	0.000712117	0.0016683	0.000429249	0.00317699	0.0119422	0.00565787	0.000266763	0.000706097	0.000728458	0.00189711	0.00145219	0.00215876	0	0	0	0	0	0
OTU_4985	Bacteria	Actinobacteria	Actinobacteria	PeM15	uncultured organism	uncultured organism	uncultured organism	0.000133004	9.4304e-05	5.66872e-05	9.19219e-05	5.67891e-05	5.55751e-05	9.4484e-05	0.000148099	5.58316e-05	0.000728374	0.000431099	0.000476548	0.000170898	0.000151209	0.000188175	0.00020988	0.000332982	0.000363817	0.000573331	0.000212318	0.000466401	0.001424	0.00185098	0.00186813	0.000524718	0.000441044	0.000503901	5.63963e-05	0.000168464	0.0001732	5.71635e-05	3.7163e-05	1.91699e-05	3.71982e-05	5.80878e-05	0	0	0	0	1.91972e-05	0	0
OTU_213	Bacteria	Bacteroidetes	Bacteroidia	Sphingobacteriales	NS11-12 marine group	uncultured Bacteroidetes bacterium	uncultured Bacteroidetes bacterium	0	0	0	0	0	0	0	1.85123e-05	0	0	0	0	0	0.000585934	0	0	3.6998e-05	0	0.0149806	0.0170241	0.0108951	3.6987e-05	0	0	0	0	0	0	0	0	0	0	0	1.85991e-05	1.93626e-05	0	0	0	0	0	0	0
OTU_297	Bacteria	Proteobacteria	Gammaproteobacteria	Gammaproteobacteria Incertae Sedis	Unknown Family	Unclassified	Unclassified	0.000855026	0.000980762	0.00234307	0.00045961	0.000473243	0.000370501	0.00153064	0.00109223	0.000800253	0.00153342	0.000974659	0.00181455	0.000664603	0.000793846	0.00101615	0.00022896	0.000258986	0.000536152	1.84945e-05	1.93017e-05	0.000223872	7.39741e-05	3.7775e-05	0.000114375	0	3.83516e-05	1.8663e-05	0.000432371	0.000786164	0.000750534	0.000171491	0.000464537	0.000824307	0.000446379	0.000503427	0.000340857	0	1.94564e-05	3.8323e-05	1.91972e-05	1.94602e-05	0
OTU_271	Bacteria	Cyanobacteria	Oxyphotobacteria	Chloroplast	Lepocinclis sp. Psurononuma100609I	Lepocinclis sp. Psurononuma100609I	Lepocinclis sp. Psurononuma100609I	0.00066502	0.000999623	0.00130381	0.00178328	0.00212013	0.000833627	0.000321246	0.000185123	0.000167495	7.66709e-05	3.74869e-05	0.00045822	0.000322807	0.000264615	0.000112905	0.000629639	0.000758459	0.000651042	0	0	0	0	0	0	0	0	0	3.75975e-05	0	3.84889e-05	0	0	0	5.57973e-05	1.93626e-05	1.89365e-05	0	0	0	0	0	1.89079e-05
OTU_278	Bacteria	Bacteroidetes	Bacteroidia	Sphingobacteriales	env.OPS 17	uncultured bacterium	uncultured bacterium	3.80011e-05	7.54432e-05	0.000151166	0	1.89297e-05	0	1.88968e-05	0	0	0	1.87434e-05	0	0	0	0	0.00013356	0.000166491	0.000325521	0	0	0	5.54806e-05	7.55501e-05	3.8125e-05	0	0	1.8663e-05	0	0	1.92445e-05	0.000152436	0.000297304	0.000440909	1.85991e-05	0	3.7873e-05	0	0	0	0	0	0
OTU_475	Bacteria	Proteobacteria	Gammaproteobacteria	Competibacterales	Competibacteraceae	Candidatus Competibacter	Unclassified	5.70017e-05	1.88608e-05	1.88957e-05	1.83844e-05	1.89297e-05	0	0	0	1.86105e-05	0	0	0	0	0	0	0	0	0	0	0	0	0	0	0	0	0	0	0	0	0	0	0	0	0	0	0	0.00293561	0.0032103	0.00109221	0.00113263	0.00389203	0.0134813
OTU_260	Bacteria	Bacteroidetes	Bacteroidia	Chitinophagales	Chitinophagaceae	uncultured	metagenome	0.000228007	0.000282912	0.000699142	0	0	0	0	1.85123e-05	0	0.00170593	0.00114335	0.00168625	0	0	0	1.908e-05	0.000166491	3.82966e-05	0	1.93017e-05	1.8656e-05	0.00101714	0.00139768	0.00120094	0	0	0	0	0	0	0.000171491	9.29074e-05	0.000191699	5.57973e-05	1.93626e-05	3.7873e-05	0	0	0	0	0	0
OTU_263	Bacteria	Bacteroidetes	Bacteroidia	Flavobacteriales	Weeksellaceae	Chryseobacterium	uncultured Chryseobacterium sp.	0	1.88608e-05	0	0	0	0	0	0	0	0	0	0	0	0	0	0	0	0	0	0	0	0.0135373	0.00619511	0.0151356	1.87399e-05	0.000210934	9.33149e-05	0	0	0	0	1.85815e-05	0	0	0	0	0	0	0	0	0	0
OTU_6609	Bacteria	Bacteroidetes	Rhodothermia	Balneolales	Balneolaceae	Unclassified	Unclassified	0	0	0	0.000183844	0.000246086	0.0002223	3.77936e-05	0.000111074	0.000111663	0.00128424	0.00133078	0.000953097	0.000151909	0.000226813	0.000206993	0.00020988	9.2495e-05	0.000229779	1.84945e-05	0	0	0.000110961	0.000113325	0.000114375	0.00361681	0.00377764	0.00343399	0.00015039	0.000131027	7.69778e-05	0.000114327	0.000148652	0.00015336	0.000111595	0.000174263	5.68096e-05	0	0	0	0	0	0
OTU_309	Bacteria	Unclassified	Unclassified	Unclassified	Unclassified	Unclassified	Unclassified	1.90006e-05	1.88608e-05	5.66872e-05	0	0	0	7.55872e-05	9.25617e-05	5.58316e-05	0.00483027	0.00809717	0.0121337	0.000341796	0.000132308	3.7635e-05	5.72399e-05	1.8499e-05	5.74449e-05	9.24727e-05	1.93017e-05	7.46241e-05	0.00316239	0.000604401	0.00257344	0	1.91758e-05	0	0.000112793	0.000187182	0.000230934	5.71635e-05	0.000204396	0.000230039	0.000297586	0.000174263	0.000397667	0	0	0	0	0	0
OTU_539	Bacteria	Chloroflexi	Anaerolineae	Caldilineales	Caldilineaceae	uncultured	uncultured bacterium	0.00034201	0.000414938	0.000226749	0.0005883	0.000492173	0.000666901	5.66904e-05	0.000148099	0.000241937	0.00111173	0.000899685	0.00106307	0.000550671	0.000907252	0.000470438	0.000267119	0.000258986	0.000344669	0	0	3.7312e-05	0	0	0	0	0	0	0.000394774	0.000224618	0.000230934	0.000190545	0.000148652	0.000268379	0.000148793	3.87252e-05	9.46826e-05	1.93132e-05	3.89128e-05	5.74845e-05	5.75915e-05	7.78407e-05	7.56315e-05
OTU_520	Bacteria	Actinobacteria	Actinobacteria	Micrococcales	Microbacteriaceae	Candidatus Limnoluna	uncultured bacterium	3.80011e-05	3.77216e-05	1.88957e-05	0	0	1.8525e-05	0	0	0	5.75032e-05	1.87434e-05	1.83288e-05	0	0	0	0	0	0	9.24727e-05	0.000135112	9.32801e-05	0.000166442	0.000207763	0.000114375	0.000149919	0.000153407	0.000167967	0	0	1.92445e-05	0	0	3.83399e-05	1.85991e-05	0	0	3.86264e-05	0	0	1.91972e-05	3.89203e-05	5.67236e-05
OTU_319	Bacteria	Proteobacteria	Alphaproteobacteria	Rhodobacterales	Rhodobacteraceae	Tabrizicola	uncultured bacterium	0	0	0	0	0	0	0	0	0	1.91677e-05	0	9.16439e-05	1.89887e-05	0.000113407	0	0	0	0	0.00164601	0.000849273	0.00151114	0.000536312	0.000585513	0.000362188	0.00297965	0.00711423	0.0134187	5.63963e-05	3.74364e-05	1.92445e-05	0	0	0	0	0	0	0	0	0	0	0	0
OTU_289	Bacteria	Bacteroidetes	Bacteroidia	Flavobacteriales	Flavobacteriaceae	Flavobacterium	Flavobacterium aquatile LMG 4008	0	1.88608e-05	0	0	0	0	1.88968e-05	0	0.0305585	0	0	0	0	0	0.00137368	0	0	0	0	0	0	0	0	1.90625e-05	0	0	0	0	0	0	0	0	0	0	0	0	0	0	0	0	0	0
OTU_328	Bacteria	Proteobacteria	Gammaproteobacteria	Xanthomonadales	Xanthomonadaceae	Silanimonas	Unclassified	0	0	0	0	0	0	0	0	5.58316e-05	0	3.74869e-05	0	0	1.89011e-05	1.88175e-05	0	0	0	0.000314407	0.00104229	0.000391776	0.000258909	0.000245538	0.00022875	0.00361681	0.00931945	0.0154716	1.87988e-05	1.87182e-05	1.92445e-05	0	0	0	0	0	1.89365e-05	0	0	0	0	0	0
OTU_307	Bacteria	Cyanobacteria	Oxyphotobacteria	Chloroplast	Unclassified	Unclassified	Unclassified	0.000247007	0.000207469	0.000642455	1.83844e-05	0	0	0	0	0	0	3.74869e-05	0.000238274	0.00620929	0.0142136	0.0070942	0.00013356	7.3996e-05	1.91483e-05	0	0	3.7312e-05	0	0	0	0	1.91758e-05	0	0	1.87182e-05	0	0	0	0	3.71982e-05	3.87252e-05	1.89365e-05	0	0	0	0	0	0
OTU_9536	Bacteria	Proteobacteria	Gammaproteobacteria	Betaproteobacteriales	Burkholderiaceae	Limnohabitans	uncultured bacterium	1.90006e-05	1.88608e-05	7.55829e-05	1.83844e-05	1.89297e-05	0	0	3.70247e-05	1.86105e-05	3.83355e-05	1.87434e-05	1.83288e-05	1.89887e-05	0	7.527e-05	0	0	0	0	0	0	0	1.88875e-05	0	7.49597e-05	0	0	1.87988e-05	1.87182e-05	0	0	0	0	7.43965e-05	3.87252e-05	1.89365e-05	7.72529e-05	7.78256e-05	0.000210776	7.67887e-05	3.89203e-05	3.78158e-05
OTU_359	Bacteria	Proteobacteria	Gammaproteobacteria	Betaproteobacteriales	Burkholderiaceae	Kerstersia	uncultured bacterium	0	0	0	0	0	0	0	0	0	3.83355e-05	0.000112461	0.000109973	0	0	1.88175e-05	0	0	0	3.69891e-05	0	0	0.000425351	0.000887714	0.000495625	1.87399e-05	1.91758e-05	0	0	0	0	0	1.85815e-05	0	1.85991e-05	1.93626e-05	5.68096e-05	0	0	0	0	0	0
OTU_401	Bacteria	Proteobacteria	Gammaproteobacteria	Betaproteobacteriales	Burkholderiaceae	Massilia	uncultured beta proteobacterium	0	3.77216e-05	7.55829e-05	0.00683899	0.000511102	0.000129675	5.66904e-05	0.000462809	0.000241937	0.000306684	1.87434e-05	0.000183288	0.000132921	5.67033e-05	0.01464	1.908e-05	3.6998e-05	1.91483e-05	0	3.86033e-05	1.8656e-05	0	0	0	0	0	0	5.63963e-05	0.000168464	0.000500356	0	3.7163e-05	0.000345059	7.43965e-05	5.80878e-05	0.000151492	0	1.94564e-05	0	0	0	0
OTU_418	Bacteria	Verrucomicrobia	Verrucomicrobiae	uncultured	uncultured Opitutae bacterium	uncultured Opitutae bacterium	uncultured Opitutae bacterium	0	0	0	0	0	0	0	0	0	0	3.74869e-05	0	0.000132921	0.000132308	0.000282263	0.00013356	0.000110994	9.57414e-05	3.69891e-05	1.93017e-05	7.46241e-05	0.000221922	0.0001511	0.000362188	9.36996e-05	3.83516e-05	5.5989e-05	0	0	0	0	0	0	0	0	0	0	0	0	0	0	0
OTU_419	Bacteria	Cyanobacteria	Oxyphotobacteria	Nostocales	Phormidiaceae	Planktothrix NIVA-CYA 15	Planktothrix agardhii NIVA-CYA 126/8	0	0	0	0	0	0	0	0	0	0.00084338	0.00054356	0.00104474	0.000322807	0.000491428	0.00030108	1.908e-05	1.8499e-05	3.82966e-05	0	0	0	0	0	1.90625e-05	0	0	0	0	0	0	0	0	0	0	0	0	0	0	0	0	0	0
OTU_459	Bacteria	Proteobacteria	Gammaproteobacteria	Legionellales	Legionellaceae	Legionella	metagenome	0	5.65824e-05	1.88957e-05	0	0	1.8525e-05	1.88968e-05	0	0	0	0	0	1.89887e-05	3.78022e-05	1.88175e-05	0	0	1.91483e-05	0	0	0	0	0	0	0	0	0	5.63963e-05	0	5.77334e-05	0	3.7163e-05	0	3.71982e-05	5.80878e-05	1.89365e-05	0	1.94564e-05	0	0	0	0
[truncated: 30 more columns]
